# Supplementary material for: Computational Modeling of complete HOXB13 protein for predicting the functional effect of SNPs and the associated role in hereditary prostate cancer
Source: PubMed Central journal article supplement (PMC5363706; doi:10.1038/srep43830), 2017-03-08
Supplement: srep43830-s2.pdf [file srep43830-s2.pdf]

1 *Computational Modeling of complete HOXB13 protein for predicting the functional effect of*  
2 *SNP's and its associated role in hereditary prostate cancer*

3 *Gopalakrishnan Chandrasekaran<sup>1</sup>, Eu Chang Hwang<sup>2</sup>, Taek Won Kang<sup>2</sup> Dongdeuk Kwon<sup>2</sup>,*  
4 *Kwangsung Park<sup>2</sup>, Je-Jung Lee<sup>3</sup>, and Vinoth-Kumar Lakshmanan<sup>1\*</sup>*

5 <sup>1</sup>*Department of Biomedical Sciences, Chonnam National University Medical School, 160 Baeksuh-Roh, Dong-Gu,*  
6 *Gwangju 61469, Republic of Korea*

7 <sup>2</sup>*Department of Urology, Chonnam National University Hwasun Hospital, Jeollanamdo, Republic of Korea*

8 <sup>3</sup>*Department of Research Center for Cancer Immunotherapy, Chonnam National University Hwasun Hospital,*  
9 *Jeollanamdo, Republic of Korea.*

10  
11 **\*Corresponding author: Prof. Vinoth Kumar Lakshmanan – [vinoth.lakshmanan@gmail.com](mailto:vinoth.lakshmanan@gmail.com)/[vinoth@jnu.ac.kr](mailto:vinoth@jnu.ac.kr)**

12  
13 **\*Corresponding author**

14 Vinoth-Kumar Lakshmanan Ph.D.

15 Associate Professor

16 Department of Biomedical Sciences

17 Chonnam National University Medical School

18 160 Baeksuh-Roh, Dong-Gu

19 Gwangju, Korea (ROK) 61469

20 Telephone: 061-379-2653

21 Fax: 061-379-2680

22 Mobile: 010-4341-7333

23 Email: [vinoth.lakshmanan@gmail.com](mailto:vinoth.lakshmanan@gmail.com), [vinoth@jnu.ac.kr](mailto:vinoth@jnu.ac.kr)

24 Website: [www.jnu.ac.kr](http://www.jnu.ac.kr)

25

26

27

28

29

30

31

32

## 33 **Supplementary Data**

### 34 **Methods**

#### 35 **Homology Modelling using MODELLER v9.1**

36 Comparative modelling involves four main steps<sup>34</sup> (see Supplementary Fig. S2 online),  
37 which are as follows:

- 38 a. Template screening, identification and initial alignment – The protein template is  
39 selected from the PDB with the help of psiBLAST.
- 40 b. Final template selection and alignment – The final template is selected among all  
41 available templates based upon the % identity and E-value.
- 42 c. Model Building – The model is built by aligning the query sequence (NP\_006352.2)  
43 against the template structures.
- 44 d. Model Evaluation and Selection – The generated models are evaluated for the low  
45 DOPE score and high GA341 Score to prove it as the best model.
- 46 e. Model Validation – The evaluated and the selected model are validated for their  
47 features and properties with the help of the Ramachandran Plot<sup>36</sup> and PDBsum.

#### 48 **Sequence format conversion**

49 The *HOXB13* protein sequence (NP\_006352) obtained from NCBI needs to be first  
50 converted to a file format, which can be read and processed by MODELLER v9.1. The sequence  
51 was converted to a PIR file format. Similar to the FASTA format the PIR file format also  
52 consists of a header denoted by >P1 followed by the sequence identifier and details. The PIR file  
53 format contains the single letter standard amino acid codes with “ \* ” in the end denoting the end  
54 of the protein sequence. The converted sequence in the PIR format was saved as “hoxb13.ali”.

#### 55 **Target Template identification and initial alignment**

56 A suitable template structure for developing the model was obtained using psiBLAST by  
57 setting PDB as the source database<sup>66</sup> for finding 3D structure templates. The resulting sequences  
58 of at least >30% similarity and identity were picked for comparative homology modelling. The  
59 Supplementary Table S8 online shows the results of psiBLAST. PDB ID 2CRA was found to  
60 have 100% identity with the query sequence and PDB ID 2LD5 and 2L7Z showed 78% identity  
61 with the query sequence and were chosen as the template for modelling the *HOXB13* protein.  
62 The respective “.pdb” files of the above-mentioned proteins were downloaded and kept in the  
63 same folder where the python script files were located. These three PDB ID structures – 2CRA,

64 2LD5 and 2L7Z were used as the template for modelling the complete *HOXB13* protein using  
65 comparative homology modelling by MODELLER v9.17. The distance tree of the query  
66 sequence and the protein structures from the PDB computed by psiBLAST can be found as  
67 Supplementary Fig. S4 online.

### 68 **Final template selection**

69 From the three chosen PDB structures (2CRA, 2LD5 and 2L7Z), the most appropriate  
70 structure for the query sequence (NP\_006352 – *HOXB13*) was chosen by the  
71 “alignment.compare\_structures()” command from MODELLER v9.17 to analyze the structural  
72 and sequence similarity between the template structures (2CRA, 2LD5 and 2L7Z) and the query  
73 sequence (NP\_006352). The Python script for the final template selection was saved as  
74 “script2.py”. The contents of the “script2.py” were given in the supplementary data. The  
75 “compare\_structure” command mainly compares the RMS deviation, dihedral angles of the main  
76 and side chain atoms, identities, similarities, etc., between the sequence and the structure. We  
77 used this command and to generate the “dendrogram” with distance matrix for analyzing and  
78 selecting the best template among the three targets. The results were logged in the “script2.log”  
79 file. From the results, we found that 2LD5 and 2L7Z were both structurally and sequentially  
80 identical with the same crystallographic resolution of 1.0Å (as Supplementary Fig. S5 online).  
81 Conversely, the structure 2CRA was found to be diversified from both 2LD5 and 2L7Z with a  
82 distance score of 63.5. Hence, the structure 2L7Z was finally selected for modelling of complete  
83 *HOXB13* because of its high sequence and structural similarity to the query sequence.

### 84 **Aligning the template 2L7Z with the query sequence (NP\_006352)**

85 The alignment of the query sequence (NP\_006352) with the template structure 2L7Z was  
86 done with the help of the “align2d()” command in MODELLER v9.17. The alignment algorithm  
87 used by the MODELLER v9.17 at this step was different from the other normal sequence  
88 alignment algorithms, since, in this case, alignment was being carried out between the sequence  
89 and the structure information. This was done with the help of the gap penalty function so that  
90 there was a greater reduction in the alignment errors when compared to other standard sequence-  
91 sequence alignment algorithms. The Python script for the alignment was saved as “script3.py”.  
92 The detailed contents of the “script3.py” were furnished in the supplementary data section. The  
93 “align2d()” command aligned the query sequence saved in PIR format as “hoxb13.ali” file with  
94 the template protein structure file saved as “2l7z.pdb”.

95 The results were logged in the “script3.log” file, and the alignment was generated as  
96 “hoxb13-2l7z.pap” and “hoxb13-2l7z.ali” files. All the identical positions were marked with “\*  
97 ”. The output of the alignment between the query sequence and the template structure can be  
98 found as Supplementary Fig. S6 online.

### 99 **Building of the complete *HOXB13* model**

100 With the help of the aligned query sequence (NP\_006352) and the template structure  
101 (2L7Z) data stored in the “hoxb13-2l7z.ali” file, MODELLER v9.17 calculated and predicted the  
102 3D model of the complete *HOXB13* protein automatically using its default “automodel” class  
103 command. MODELLER v9.17 was instructed to generate 30 similar models of complete  
104 *HOXB13* protein based on the 2L7Z template structure and “hox13-2l7z.ali” file. The Python  
105 script for the model building was saved as “script4.py”. The complete “script4” s given in the  
106 supplementary data.

107 The results of the model building script were stored in the “script4.log” file.  
108 MODELLER v9.17 calculated, set the parameters, and computed to build the model  
109 automatically. Since we instructed the program to generate 30 similar models, MODELLER  
110 v9.17 generated 30 similar models with a “.pdb” file and corresponding log files. The results of  
111 the script4 are given in Figure S7. MODELLER v9.17 successfully constructed 30 similar  
112 complete *HOXB13* models with their corresponding molpdf values, DOPE score and GA341  
113 score, which were helpful in choosing the best model out of the 30 models generated. The entire  
114 results of script 4 can be found in Supplementary Fig. S7 online.

### 115 **Evaluating the generated *HOXB13* models and selecting the best model**

116 There are several criteria to select the best model among the various models generated by  
117 MODELLER v9.17. The most important and widely practised criteria includes selecting the  
118 model with the lowest DOPE score<sup>67</sup> and the highest GA341 score<sup>68</sup>. Accordingly, from the  
119 summary of the models generated (Figure S7.), we found that the 26<sup>th</sup> model  
120 “hoxb13.B99990026.pdb” had the lowest DOPE score of -10661.23047 and the highest GA341  
121 score of 1.00000. Thus, the selected model “hoxb13.B99990026.pdb” was subjected to further  
122 validation of protein structure and folding properties with the help of the Ramachandran Plot and  
123 PDBSum.

124

125

| Table S1. List of nsSNP's predicted by SIFT as deleterious |             |                      |              |            |                          |
|------------------------------------------------------------|-------------|----------------------|--------------|------------|--------------------------|
| Variant ID                                                 | NCBI AC. No | Nucleotide Variation | AA Variation | SIFT Score | SIFT Tolerance Index     |
| rs752722523                                                | NP_006352   | G-A                  | A282T        | 0.65       | Tolerated                |
| rs763960333                                                | NP_006352   | G-C                  | S281T        | 0.51       | Tolerated                |
| rs200997384                                                | NP_006352   | G-T                  | V278L        | 0.74       | Tolerated                |
| rs191886930                                                | NP_006352   | G-A                  | A276T        | 0.19       | Tolerated                |
| rs761914407                                                | NP_006352   | C-T                  | R215C        | 0          | Affects Protein Function |
| rs145059285                                                | NP_006352   | G-A                  | A212T        | 0.32       | Tolerated                |
| rs758190709                                                | NP_006352   | C-T                  | A210V        | 0.29       | Tolerated                |
| rs766169510                                                | NP_006352   | G-C                  | Q205H        | 0.43       | Tolerated                |
| rs761530565                                                | NP_006352   | A-G                  | Q205R        | 0.87       | Tolerated                |
| rs750945370                                                | NP_006352   | G-T                  | A200S        | 0.23       | Tolerated                |
| rs756654236                                                | NP_006352   | G-A                  | A197T        | 0.16       | Tolerated                |
| rs780355420                                                | NP_006352   | T-A                  | F194I        | 0.13       | Tolerated                |
| rs779330626                                                | NP_006352   | A-G                  | Q188R        | 0          | Affects Protein Function |
| rs748353425                                                | NP_006352   | G-A                  | M182I        | 0.16       | Tolerated                |
| rs772349818                                                | NP_006352   | T-C                  | M182T        | 0.05       | Affects Protein Function |
| rs570681642                                                | NP_006352   | A-G                  | Q181R        | 0          | Affects Protein Function |
| rs777986934                                                | NP_006352   | G-T                  | G177V        | 0          | Affects Protein Function |
| rs539086211                                                | NP_006352   | G-A                  | G176D        | 0.03       | Affects Protein Function |
| rs747003841                                                | NP_006352   | G-C                  | G176R        | 0.01       | Affects Protein Function |
| rs148649390                                                | NP_006352   | G-T                  | A175S        | 0.86       | Tolerated                |
| rs587780164                                                | NP_006352   | G-A                  | D167N        | 0.01       | Affects Protein Function |
| rs751081605                                                | NP_006352   | C-G                  | S162C        | 0.01       | Affects Protein Function |
| rs587780163                                                | NP_006352   | C-T                  | A154V        | 0.01       | Affects Protein Function |
| rs766929278                                                | NP_006352   | G-T                  | G153V        | 0          | Affects Protein Function |
| rs754280897                                                | NP_006352   | G-A                  | G153S        | 0.45       | Tolerated                |
| rs140373548                                                | NP_006352   | C-A                  | L152M        | 0.08       | Tolerated                |
| rs587780162                                                | NP_006352   | G-A                  | V146M        | 0.52       | Tolerated                |
| rs556045007                                                | NP_006352   | C-T                  | A141V        | 0          | Affects Protein Function |
| rs575899185                                                | NP_006352   | G-C                  | Q138H        | 0.01       | Affects Protein Function |
| rs770891609                                                | NP_006352   | A-C                  | Y137S        | 0.01       | Affects Protein Function |
| rs745800027                                                | NP_006352   | A-C                  | T136P        | 1          | Tolerated                |
| rs769634543                                                | NP_006352   | G-A                  | G135E        | 0.01       | Affects Protein Function |
| rs775273363                                                | NP_006352   | C-T                  | A128V        | 0          | Affects Protein Function |

|                    |           |     |       |      |                          |
|--------------------|-----------|-----|-------|------|--------------------------|
| <b>rs762666370</b> | NP_006352 | C-G | P124R | 0.19 | Tolerated                |
| <b>rs201428095</b> | NP_006352 | G-A | R123H | 0.01 | Affects Protein Function |
| <b>rs8556</b>      | NP_006352 | C-A | S122R | 0    | Affects Protein Function |
| <b>rs766909225</b> | NP_006352 | C-G | P121A | 0.09 | Tolerated                |
| <b>rs760111060</b> | NP_006352 | G-A | G117E | 0    | Affects Protein Function |
| <b>rs533641489</b> | NP_006352 | G-A | G117R | 0    | Affects Protein Function |
| <b>rs764401781</b> | NP_006352 | C-T | T115M | 0.06 | Tolerated                |
| <b>rs751698154</b> | NP_006352 | C-A | P114T | 0.56 | Tolerated                |
| <b>rs781117900</b> | NP_006352 | C-A | A111E | 0.16 | Tolerated                |
| <b>rs745889927</b> | NP_006352 | G-A | A111T | 0.46 | Tolerated                |
| <b>rs370361482</b> | NP_006352 | C-G | P110A | 1    | Tolerated                |
| <b>rs774095240</b> | NP_006352 | C-T | A108V | 0.09 | Tolerated                |
| <b>rs747755369</b> | NP_006352 | G-C | A107P | 0.34 | Tolerated                |
| <b>rs771674803</b> | NP_006352 | T-G | L106R | 0.32 | Tolerated                |
| <b>rs140492479</b> | NP_006352 | C-T | T105I | 0.34 | Tolerated                |
| <b>rs760196832</b> | NP_006352 | C-T | A103V | 0.1  | Tolerated                |
| <b>rs763448911</b> | NP_006352 | C-T | A101V | 0.04 | Affects Protein Function |
| <b>rs764359688</b> | NP_006352 | C-A | P99T  | 0.32 | Tolerated                |
| <b>rs751865027</b> | NP_006352 | T-A | L97Q  | 0.19 | Tolerated                |
| <b>rs757433384</b> | NP_006352 | C-A | L97M  | 0.03 | Affects Protein Function |
| <b>rs756135357</b> | NP_006352 | G-A | R94Q  | 0.1  | Tolerated                |
| <b>rs780012601</b> | NP_006352 | T-G | S93A  | 0.33 | Tolerated                |
| <b>rs778563157</b> | NP_006352 | G-A | G85D  | 0.27 | Tolerated                |
| <b>rs529392210</b> | NP_006352 | G-A | G85S  | 0.91 | Tolerated                |
| <b>rs138213197</b> | NP_006352 | G-A | G84E  | 0    | Affects Protein Function |
| <b>rs772962401</b> | NP_006352 | A-G | Y80C  | 0    | Affects Protein Function |
| <b>rs746542615</b> | NP_006352 | G-T | V78L  | 1    | Tolerated                |
| <b>rs763353615</b> | NP_006352 | C-T | T73M  | 0    | Affects Protein Function |
| <b>rs774579054</b> | NP_006352 | G-T | G72V  | 0.05 | Tolerated                |
| <b>rs750621041</b> | NP_006352 | C-T | P70L  | 0.15 | Tolerated                |
| <b>rs370934116</b> | NP_006352 | C-A | P70T  | 0.61 | Tolerated                |
| <b>rs766443552</b> | NP_006352 | G-T | V69L  | 0.21 | Tolerated                |
| <b>rs587780161</b> | NP_006352 | C-T | P67S  | 0.85 | Tolerated                |
| <b>rs778843798</b> | NP_006352 | T-C | C66R  | 0    | Affects Protein Function |
| <b>rs199813155</b> | NP_006352 | G-A | C63Y  | 0    | Affects Protein Function |
| <b>rs758166293</b> | NP_006352 | T-G | C63G  | 0.03 | Affects Protein Function |
| <b>rs568967699</b> | NP_006352 | A-T | K61M  | 0    | Affects Protein Function |
| <b>rs770620686</b> | NP_006352 | C-T | P59L  | 0.02 | Affects Protein Function |
| <b>rs745306184</b> | NP_006352 | G-T | A57S  | 0.58 | Tolerated                |
| <b>rs769074510</b> | NP_006352 | C-T | P54S  | 0.54 | Tolerated                |

|                    |           |     |      |      |                                 |
|--------------------|-----------|-----|------|------|---------------------------------|
| <b>rs11551892</b>  | NP_006352 | G-C | A49P | 0.33 | Tolerated                       |
| <b>rs748333323</b> | NP_006352 | A-G | N47S | 1    | Tolerated                       |
| <b>rs199799743</b> | NP_006352 | C-T | T41M | 0.03 | <b>Affects Protein Function</b> |
| <b>rs773491778</b> | NP_006352 | C-A | A39E | 0.04 | <b>Affects Protein Function</b> |
| <b>rs760874697</b> | NP_006352 | G-T | A39S | 0.98 | Tolerated                       |
| <b>rs587780160</b> | NP_006352 | C-A | A38E | 0.05 | Tolerated                       |
| <b>rs550726919</b> | NP_006352 | C-A | H36N | 0.22 | Tolerated                       |
| <b>rs79344505</b>  | NP_006352 | C-A | L33M | 0.04 | Tolerated                       |
| <b>rs758169931</b> | NP_006352 | C-G | S31C | 0.18 | Tolerated                       |
| <b>rs561048036</b> | NP_006352 | C-G | H30Q | 0    | <b>Affects Protein Function</b> |
| <b>rs751338230</b> | NP_006352 | A-G | H30R | 0.15 | Tolerated                       |
| <b>rs756970136</b> | NP_006352 | G-T | A29S | 0.47 | Tolerated                       |
| <b>rs587780165</b> | NP_006352 | G-A | R25Q | 0.01 | <b>Affects Protein Function</b> |
| <b>rs780947625</b> | NP_006352 | G-A | G24R | 0.01 | <b>Affects Protein Function</b> |
| <b>rs745392080</b> | NP_006352 | G-A | G23E | 0.3  | Tolerated                       |
| <b>rs769323553</b> | NP_006352 | G-A | G23R | 0.37 | Tolerated                       |
| <b>rs539706443</b> | NP_006352 | G-A | G22R | 0.05 | <b>Affects Protein Function</b> |
| <b>rs772484566</b> | NP_006352 | C-T | A21V | 0.01 | <b>Affects Protein Function</b> |
| <b>rs747307642</b> | NP_006352 | C-T | T8I  | 0.18 | Tolerated                       |
| <b>rs771173385</b> | NP_006352 | A-T | Y6F  | 0.61 | Tolerated                       |
| <b>rs776869015</b> | NP_006352 | G-T | G4V  | 0    | <b>Affects Protein Function</b> |
| <b>rs546307661</b> | NP_006352 | C-A | P3T  | 0.02 | <b>Affects Protein Function</b> |

128

129

130

131

132

133

134

135

136

137

138

139

140

| Table S2. List of nsSNP's predicted by PolyPhen as deleterious |                      |              |            |             |             |             |
|----------------------------------------------------------------|----------------------|--------------|------------|-------------|-------------|-------------|
| Variant ID                                                     | Nucleotide Variation | AA Variation | PolyPhen-2 |             |             |             |
|                                                                |                      |              | Score      | Predictions | Sensitivity | Specificity |
| rs752722523                                                    | G-A                  | A282T        | 0          | Benign      | 1           | 0           |
| rs763960333                                                    | G-C                  | S281T        | 0          | Benign      | 1           | 0           |
| rs200997384                                                    | G-T                  | V278L        | 0.017      | Benign      | 0.95        | 0.8         |
| rs191886930                                                    | G-A                  | A276T        | 0.998      | PD          | 0.27        | 0.99        |
| rs761914407                                                    | C-T                  | R215C        | 1          | PD          | 0           | 1           |
| rs145059285                                                    | G-A                  | A212T        | 0          | Benign      | 1           | 0           |
| rs758190709                                                    | C-T                  | A210V        | 0.011      | Benign      | 0.96        | 0.78        |
| rs766169510                                                    | G-C                  | Q205H        | 0.968      | PD          | 0.77        | 0.95        |
| rs761530565                                                    | A-G                  | Q205R        | 0.538      | PSD         | 0.88        | 0.91        |
| rs750945370                                                    | G-T                  | A200S        | 0.996      | PD          | 0.55        | 0.98        |
| rs756654236                                                    | G-A                  | A197T        | 0.001      | Benign      | 0.99        | 0.15        |
| rs780355420                                                    | T-A                  | F194I        | 0.329      | Benign      | 0.9         | 0.89        |
| rs779330626                                                    | A-G                  | Q188R        | 0.985      | PD          | 0.74        | 0.96        |
| rs748353425                                                    | G-A                  | M182I        | 0.002      | Benign      | 0.99        | 0.3         |
| rs772349818                                                    | T-C                  | M182T        | 0.012      | Benign      | 0.96        | 0.78        |
| rs570681642                                                    | A-G                  | Q181R        | 0.993      | PD          | 0.7         | 0.97        |
| rs777986934                                                    | G-T                  | G177V        | 0.997      | PD          | 0.41        | 0.98        |
| rs539086211                                                    | G-A                  | G176D        | 0.061      | Benign      | 0.94        | 0.84        |
| rs747003841                                                    | G-C                  | G176R        | 0.314      | Benign      | 0.9         | 0.89        |
| rs148649390                                                    | G-T                  | A175S        | 0.006      | Benign      | 0.97        | 0.75        |
| rs587780164                                                    | G-A                  | D167N        | 0.958      | PD          | 0.78        | 0.95        |
| rs751081605                                                    | C-G                  | S162C        | 0.845      | PD          | 0.83        | 0.93        |
| rs587780163                                                    | C-T                  | A154V        | 0.03       | Benign      | 0.95        | 0.82        |
| rs766929278                                                    | G-T                  | G153V        | 1          | PD          | 0           | 1           |
| rs754280897                                                    | G-A                  | G153S        | 1          | PD          | 0           | 1           |
| rs140373548                                                    | C-A                  | L152M        | 0.998      | PD          | 0.27        | 0.99        |
| rs587780162                                                    | G-A                  | V146M        | 0.999      | PD          | 0.14        | 0.99        |
| rs556045007                                                    | C-T                  | A141V        | 0.958      | PD          | 0.78        | 0.95        |
| rs575899185                                                    | G-C                  | Q138H        | 0.998      | PD          | 0.27        | 0.99        |
| rs770891609                                                    | A-C                  | Y137S        | 0.999      | PD          | 0.14        | 0.99        |
| rs745800027                                                    | A-C                  | T136P        | 0          | Benign      | 1           | 0           |
| rs769634543                                                    | G-A                  | G135E        | 0.976      | PD          | 0.76        | 0.96        |
| rs775273363                                                    | C-T                  | A128V        | 0.999      | PD          | 0.14        | 0.99        |
| rs762666370                                                    | C-G                  | P124R        | 0.993      | PD          | 0.7         | 0.97        |
| rs201428095                                                    | G-A                  | R123H        | 1          | PD          | 0           | 1           |



|             |     |       |       |        |      |      |
|-------------|-----|-------|-------|--------|------|------|
| rs8556      | C-A | S122R | 0.044 | Benign | 0.94 | 0.83 |
| rs766909225 | C-G | P121A | 0.005 | Benign | 0.97 | 0.74 |
| rs760111060 | G-A | G117E | 0.055 | Benign | 0.94 | 0.84 |
| rs533641489 | G-A | G117R | 0.537 | PSD    | 0.88 | 0.9  |
| rs764401781 | C-T | T115M | 0.404 | Benign | 0.89 | 0.9  |
| rs751698154 | C-A | P114T | 0.001 | Benign | 0.99 | 0.15 |
| rs781117900 | C-A | A111E | 0.03  | Benign | 0.95 | 0.82 |
| rs745889927 | G-A | A111T | 0     | Benign | 1    | 0    |
| rs370361482 | C-G | P110A | 0.906 | PSD    | 0.82 | 0.94 |
| rs774095240 | C-T | A108V | 0.412 | Benign | 0.92 | 0.86 |
| rs747755369 | G-C | A107P | 0     | Benign | 1    | 0    |
| rs771674803 | T-G | L106R | 0.999 | PD     | 0.14 | 0.99 |
| rs140492479 | C-T | T105I | 0.049 | Benign | 0.94 | 0.83 |
| rs760196832 | C-T | A103V | 0.052 | Benign | 0.94 | 0.83 |
| rs763448911 | C-T | A101V | 0.201 | Benign | 0.92 | 0.88 |
| rs764359688 | C-A | P99T  | 0.704 | PSD    | 0.86 | 0.92 |
| rs751865027 | T-A | L97Q  | 1     | PD     | 0    | 1    |
| rs757433384 | C-A | L97M  | 0.999 | PD     | 0.14 | 0.99 |
| rs756135357 | G-A | R94Q  | 1     | PD     | 0    | 1    |
| rs780012601 | T-G | S93A  | 0     | Benign | 1    | 0    |
| rs778563157 | G-A | G85D  | 0.827 | PSD    | 0.84 | 0.93 |
| rs529392210 | G-A | G85S  | 0.271 | Benign | 0.91 | 0.88 |
| rs138213197 | G-A | G84E  | 1     | PD     | 0    | 1    |
| rs772962401 | A-G | Y80C  | 1     | PD     | 0    | 1    |
| rs746542615 | G-T | V78L  | 0.005 | Benign | 0.97 | 0.74 |
| rs763353615 | C-T | T73M  | 0.905 | PSD    | 0.82 | 0.94 |
| rs774579054 | G-T | G72V  | 0.905 | PSD    | 0.82 | 0.94 |
| rs750621041 | C-T | P70L  | 0.996 | PD     | 0.55 | 0.98 |
| rs370934116 | C-A | P70T  | 0.996 | PD     | 0.55 | 0.98 |
| rs766443552 | G-T | V69L  | 0     | Benign | 1    | 0    |
| rs587780161 | C-T | P67S  | 0.001 | Benign | 0.99 | 0.15 |
| rs778843798 | T-C | C66R  | 0.278 | Benign | 0.91 | 0.88 |
| rs199813155 | G-A | C63Y  | 0.997 | PD     | 0.41 | 0.98 |
| rs758166293 | T-G | C63G  | 0.997 | PD     | 0.41 | 0.98 |
| rs568967699 | A-T | K61M  | 1     | PD     | 0    | 1    |
| rs770620686 | C-T | P59L  | 0.964 | PD     | 0.78 | 0.95 |
| rs745306184 | G-T | A57S  | 0.002 | Benign | 0.99 | 0.3  |
| rs769074510 | C-T | P54S  | 0.032 | Benign | 0.95 | 0.82 |
| rs11551892  | G-C | A49P  | 0     | Benign | 1    | 0    |
| rs748333323 | A-G | N47S  | 0     | Benign | 1    | 0    |

|                    |                          |      |       |            |                          |      |
|--------------------|--------------------------|------|-------|------------|--------------------------|------|
| <b>rs199799743</b> | C-T                      | T41M | 0.768 | <b>PSD</b> | 0.85                     | 0.92 |
| <b>rs773491778</b> | C-A                      | A39E | 0.116 | Benign     | 0.93                     | 0.86 |
| <b>rs760874697</b> | G-T                      | A39S | 0.001 | Benign     | 0.99                     | 0.15 |
| <b>rs587780160</b> | C-A                      | A38E | 0.061 | Benign     | 0.94                     | 0.84 |
| <b>rs550726919</b> | C-A                      | H36N | 0.925 | <b>PSD</b> | 0.81                     | 0.94 |
| <b>rs79344505</b>  | C-A                      | L33M | 0.037 | Benign     | 0.94                     | 0.82 |
| <b>rs758169931</b> | C-G                      | S31C | 0.808 | <b>PSD</b> | 0.84                     | 0.93 |
| <b>rs561048036</b> | C-G                      | H30Q | 0.57  | <b>PSD</b> | 0.88                     | 0.91 |
| <b>rs751338230</b> | A-G                      | H30R | 0.274 | Benign     | 0.91                     | 0.88 |
| <b>rs756970136</b> | G-T                      | A29S | 0.002 | Benign     | 0.99                     | 0.3  |
| <b>rs587780165</b> | G-A                      | R25Q | 0.998 | <b>PD</b>  | 0.27                     | 0.99 |
| <b>rs780947625</b> | G-A                      | G24R | 0.074 | Benign     | 0.93                     | 0.84 |
| <b>rs745392080</b> | G-A                      | G23E | 0.085 | Benign     | 0.93                     | 0.85 |
| <b>rs769323553</b> | G-A                      | G23R | 0.157 | Benign     | 0.92                     | 0.87 |
| <b>rs539706443</b> | G-A                      | G22R | 0.997 | <b>PD</b>  | 0.41                     | 0.98 |
| <b>rs772484566</b> | C-T                      | A21V | 0.001 | Benign     | 0.99                     | 0.15 |
| <b>rs747307642</b> | C-T                      | T8I  | 0.652 | <b>PSD</b> | 0.87                     | 0.91 |
| <b>rs771173385</b> | A-T                      | Y6F  | 0.851 | <b>PSD</b> | 0.83                     | 0.93 |
| <b>rs776869015</b> | G-T                      | G4V  | 0     | Benign     | 1                        | 0    |
| <b>rs546307661</b> | C-A                      | P3T  | 0.099 | Benign     | 0.93                     | 0.85 |
| <b>PD</b>          | <b>Probably Damaging</b> |      |       | <b>PSD</b> | <b>Possibly Damaging</b> |      |

142

143

144

145

146

147

148

149

150

151

152

153

154

155

**Table S3. List of nsSNP's predicted by PANTHER as deleterious**

| <b>Variant ID</b> | <b>NCBI AC. No</b> | <b>Nucleotide Variation</b> | <b>AA Variation</b> | <b>PANTHER Prediction</b> |
|-------------------|--------------------|-----------------------------|---------------------|---------------------------|
| rs752722523       | NP_006352          | G-A                         | A282T               | probably benign           |
| rs763960333       | NP_006352          | G-C                         | S281T               | probably benign           |
| rs200997384       | NP_006352          | G-T                         | V278L               | probably benign           |
| rs191886930       | NP_006352          | G-A                         | A276T               | probably benign           |
| rs761914407       | NP_006352          | C-T                         | R215C               | probably damaging         |
| rs145059285       | NP_006352          | G-A                         | A212T               | probably benign           |
| rs758190709       | NP_006352          | C-T                         | A210V               | probably benign           |
| rs766169510       | NP_006352          | G-C                         | Q205H               | probably benign           |
| rs761530565       | NP_006352          | A-G                         | Q205R               | probably benign           |
| rs750945370       | NP_006352          | G-T                         | A200S               | probably benign           |
| rs756654236       | NP_006352          | G-A                         | A197T               | probably benign           |
| rs780355420       | NP_006352          | T-A                         | F194I               | probably benign           |
| rs779330626       | NP_006352          | A-G                         | Q188R               | probably damaging         |
| rs748353425       | NP_006352          | G-A                         | M182I               | probably benign           |
| rs772349818       | NP_006352          | T-C                         | M182T               | probably benign           |
| rs570681642       | NP_006352          | A-G                         | Q181R               | probably damaging         |
| rs777986934       | NP_006352          | G-T                         | G177V               | probably damaging         |
| rs539086211       | NP_006352          | G-A                         | G176D               | probably benign           |
| rs747003841       | NP_006352          | G-C                         | G176R               | probably benign           |
| rs148649390       | NP_006352          | G-T                         | A175S               | probably benign           |
| rs587780164       | NP_006352          | G-A                         | D167N               | probably benign           |
| rs751081605       | NP_006352          | C-G                         | S162C               | probably benign           |
| rs587780163       | NP_006352          | C-T                         | A154V               | probably benign           |
| rs766929278       | NP_006352          | G-T                         | G153V               | possibly damaging         |
| rs754280897       | NP_006352          | G-A                         | G153S               | possibly damaging         |
| rs140373548       | NP_006352          | C-A                         | L152M               | possibly damaging         |
| rs587780162       | NP_006352          | G-A                         | V146M               | probably benign           |
| rs556045007       | NP_006352          | C-T                         | A141V               | probably benign           |
| rs575899185       | NP_006352          | G-C                         | Q138H               | probably damaging         |
| rs770891609       | NP_006352          | A-C                         | Y137S               | probably damaging         |
| rs745800027       | NP_006352          | A-C                         | T136P               | probably benign           |
| rs769634543       | NP_006352          | G-A                         | G135E               | possibly damaging         |
| rs775273363       | NP_006352          | C-T                         | A128V               | probably damaging         |
| rs762666370       | NP_006352          | C-G                         | P124R               | probably benign           |
| rs201428095       | NP_006352          | G-A                         | R123H               | probably damaging         |
| rs8556            | NP_006352          | C-A                         | S122R               | probably damaging         |
| rs766909225       | NP_006352          | C-G                         | P121A               | probably benign           |

|             |           |     |       |                   |
|-------------|-----------|-----|-------|-------------------|
| rs760111060 | NP_006352 | G-A | G117E | probably benign   |
| rs533641489 | NP_006352 | G-A | G117R | probably benign   |
| rs764401781 | NP_006352 | C-T | T115M | probably benign   |
| rs751698154 | NP_006352 | C-A | P114T | probably benign   |
| rs781117900 | NP_006352 | C-A | A111E | probably benign   |
| rs745889927 | NP_006352 | G-A | A111T | probably benign   |
| rs370361482 | NP_006352 | C-G | P110A | probably benign   |
| rs774095240 | NP_006352 | C-T | A108V | probably benign   |
| rs747755369 | NP_006352 | G-C | A107P | probably benign   |
| rs771674803 | NP_006352 | T-G | L106R | probably benign   |
| rs140492479 | NP_006352 | C-T | T105I | probably benign   |
| rs760196832 | NP_006352 | C-T | A103V | probably benign   |
| rs763448911 | NP_006352 | C-T | A101V | probably benign   |
| rs764359688 | NP_006352 | C-A | P99T  | probably benign   |
| rs751865027 | NP_006352 | T-A | L97Q  | probably benign   |
| rs757433384 | NP_006352 | C-A | L97M  | probably benign   |
| rs756135357 | NP_006352 | G-A | R94Q  | probably benign   |
| rs780012601 | NP_006352 | T-G | S93A  | probably benign   |
| rs778563157 | NP_006352 | G-A | G85D  | probably benign   |
| rs529392210 | NP_006352 | G-A | G85S  | probably benign   |
| rs138213197 | NP_006352 | G-A | G84E  | probably damaging |
| rs772962401 | NP_006352 | A-G | Y80C  | probably damaging |
| rs746542615 | NP_006352 | G-T | V78L  | probably benign   |
| rs763353615 | NP_006352 | C-T | T73M  | probably benign   |
| rs774579054 | NP_006352 | G-T | G72V  | probably benign   |
| rs750621041 | NP_006352 | C-T | P70L  | probably benign   |
| rs370934116 | NP_006352 | C-A | P70T  | probably benign   |
| rs766443552 | NP_006352 | G-T | V69L  | probably benign   |
| rs587780161 | NP_006352 | C-T | P67S  | probably benign   |
| rs778843798 | NP_006352 | T-C | C66R  | probably damaging |
| rs199813155 | NP_006352 | G-A | C63Y  | probably damaging |
| rs758166293 | NP_006352 | T-G | C63G  | probably damaging |
| rs568967699 | NP_006352 | A-T | K61M  | probably damaging |
| rs770620686 | NP_006352 | C-T | P59L  | probably damaging |
| rs745306184 | NP_006352 | G-T | A57S  | probably benign   |
| rs769074510 | NP_006352 | C-T | P54S  | probably benign   |
| rs11551892  | NP_006352 | G-C | A49P  | probably benign   |
| rs748333323 | NP_006352 | A-G | N47S  | probably benign   |
| rs199799743 | NP_006352 | C-T | T41M  | probably benign   |
| rs773491778 | NP_006352 | C-A | A39E  | possibly damaging |

|                    |           |     |      |                   |
|--------------------|-----------|-----|------|-------------------|
| <b>rs760874697</b> | NP_006352 | G-T | A39S | possibly damaging |
| <b>rs587780160</b> | NP_006352 | C-A | A38E | probably benign   |
| <b>rs550726919</b> | NP_006352 | C-A | H36N | probably benign   |
| <b>rs79344505</b>  | NP_006352 | C-A | L33M | probably benign   |
| <b>rs758169931</b> | NP_006352 | C-G | S31C | probably benign   |
| <b>rs561048036</b> | NP_006352 | C-G | H30Q | probably damaging |
| <b>rs751338230</b> | NP_006352 | A-G | H30R | probably damaging |
| <b>rs756970136</b> | NP_006352 | G-T | A29S | probably benign   |
| <b>rs587780165</b> | NP_006352 | G-A | R25Q | probably damaging |
| <b>rs780947625</b> | NP_006352 | G-A | G24R | probably benign   |
| <b>rs745392080</b> | NP_006352 | G-A | G23E | probably benign   |
| <b>rs769323553</b> | NP_006352 | G-A | G23R | probably benign   |
| <b>rs539706443</b> | NP_006352 | G-A | G22R | probably benign   |
| <b>rs772484566</b> | NP_006352 | C-T | A21V | probably benign   |
| <b>rs747307642</b> | NP_006352 | C-T | T8I  | probably benign   |
| <b>rs771173385</b> | NP_006352 | A-T | Y6F  | probably benign   |
| <b>rs776869015</b> | NP_006352 | G-T | G4V  | probably benign   |
| <b>rs546307661</b> | NP_006352 | C-A | P3T  | probably benign   |

156

157

158

159

160

161

162

163

164

165

166

167

168

169

170

171

**Table S4. List of nsSNP's predicted by PROVEAN as deleterious**

| <b>Variant ID</b> | <b>NCBI AC. No</b> | <b>Nucleotide Variation</b> | <b>AA Variation</b> | <b>PROVEAN SCORE</b> | <b>PROVEAN Prediction</b> |
|-------------------|--------------------|-----------------------------|---------------------|----------------------|---------------------------|
| rs752722523       | NP_006352          | G-A                         | A282T               | 0.042                | Neutral                   |
| rs763960333       | NP_006352          | G-C                         | S281T               | 0.664                | Neutral                   |
| rs200997384       | NP_006352          | G-T                         | V278L               | 0.881                | Neutral                   |
| rs191886930       | NP_006352          | G-A                         | A276T               | -0.061               | Neutral                   |
| rs761914407       | NP_006352          | C-T                         | R215C               | -6.781               | Deleterious               |
| rs145059285       | NP_006352          | G-A                         | A212T               | -0.156               | Neutral                   |
| rs758190709       | NP_006352          | C-T                         | A210V               | -0.297               | Neutral                   |
| rs766169510       | NP_006352          | G-C                         | Q205H               | -0.501               | Neutral                   |
| rs761530565       | NP_006352          | A-G                         | Q205R               | -0.446               | Neutral                   |
| rs750945370       | NP_006352          | G-T                         | A200S               | -0.349               | Neutral                   |
| rs756654236       | NP_006352          | G-A                         | A197T               | 0.04                 | Neutral                   |
| rs780355420       | NP_006352          | T-A                         | F194I               | -0.423               | Neutral                   |
| rs779330626       | NP_006352          | A-G                         | Q188R               | -3.397               | Deleterious               |
| rs748353425       | NP_006352          | G-A                         | M182I               | -0.434               | Neutral                   |
| rs772349818       | NP_006352          | T-C                         | M182T               | -2.836               | Deleterious               |
| rs570681642       | NP_006352          | A-G                         | Q181R               | -3.355               | Deleterious               |
| rs777986934       | NP_006352          | G-T                         | G177V               | -7.026               | Deleterious               |
| rs539086211       | NP_006352          | G-A                         | G176D               | 0.346                | Neutral                   |
| rs747003841       | NP_006352          | G-C                         | G176R               | -0.784               | Neutral                   |
| rs148649390       | NP_006352          | G-T                         | A175S               | -0.063               | Neutral                   |
| rs587780164       | NP_006352          | G-A                         | D167N               | -2.914               | Deleterious               |
| rs751081605       | NP_006352          | C-G                         | S162C               | -1.91                | Neutral                   |
| rs587780163       | NP_006352          | C-T                         | A154V               | -2.246               | Neutral                   |
| rs766929278       | NP_006352          | G-T                         | G153V               | -4.476               | Deleterious               |
| rs754280897       | NP_006352          | G-A                         | G153S               | -1.401               | Neutral                   |
| rs140373548       | NP_006352          | C-A                         | L152M               | -1.02                | Neutral                   |
| rs587780162       | NP_006352          | G-A                         | V146M               | 0.2                  | Neutral                   |
| rs556045007       | NP_006352          | C-T                         | A141V               | -1.561               | Neutral                   |
| rs575899185       | NP_006352          | G-C                         | Q138H               | -2.605               | Deleterious               |
| rs770891609       | NP_006352          | A-C                         | Y137S               | -7.227               | Deleterious               |
| rs745800027       | NP_006352          | A-C                         | T136P               | 4.834                | Neutral                   |
| rs769634543       | NP_006352          | G-A                         | G135E               | -2.745               | Deleterious               |
| rs775273363       | NP_006352          | C-T                         | A128V               | -3.159               | Deleterious               |
| rs762666370       | NP_006352          | C-G                         | P124R               | -1.079               | Neutral                   |
| rs201428095       | NP_006352          | G-A                         | R123H               | -4.202               | Deleterious               |
| rs8556            | NP_006352          | C-A                         | S122R               | -3.662               | Deleterious               |
| rs766909225       | NP_006352          | C-G                         | P121A               | -0.859               | Neutral                   |

|             |           |     |       |        |             |
|-------------|-----------|-----|-------|--------|-------------|
| rs760111060 | NP_006352 | G-A | G117E | -3.229 | Deleterious |
| rs533641489 | NP_006352 | G-A | G117R | -3.205 | Deleterious |
| rs764401781 | NP_006352 | C-T | T115M | 0.287  | Neutral     |
| rs751698154 | NP_006352 | C-A | P114T | -0.506 | Neutral     |
| rs781117900 | NP_006352 | C-A | A111E | -0.244 | Neutral     |
| rs745889927 | NP_006352 | G-A | A111T | -0.392 | Neutral     |
| rs370361482 | NP_006352 | C-G | P110A | -0.994 | Neutral     |
| rs774095240 | NP_006352 | C-T | A108V | -1.634 | Neutral     |
| rs747755369 | NP_006352 | G-C | A107P | -1.472 | Neutral     |
| rs771674803 | NP_006352 | T-G | L106R | -1.488 | Neutral     |
| rs140492479 | NP_006352 | C-T | T105I | -0.984 | Neutral     |
| rs760196832 | NP_006352 | C-T | A103V | -1.321 | Neutral     |
| rs763448911 | NP_006352 | C-T | A101V | -1.803 | Neutral     |
| rs764359688 | NP_006352 | C-A | P99T  | 0.059  | Neutral     |
| rs751865027 | NP_006352 | T-A | L97Q  | -2.115 | Neutral     |
| rs757433384 | NP_006352 | C-A | L97M  | -0.739 | Neutral     |
| rs756135357 | NP_006352 | G-A | R94Q  | -0.084 | Neutral     |
| rs780012601 | NP_006352 | T-G | S93A  | -0.898 | Neutral     |
| rs778563157 | NP_006352 | G-A | G85D  | -1.385 | Neutral     |
| rs529392210 | NP_006352 | G-A | G85S  | 0.15   | Neutral     |
| rs138213197 | NP_006352 | G-A | G84E  | -6.485 | Deleterious |
| rs772962401 | NP_006352 | A-G | Y80C  | -6.313 | Deleterious |
| rs746542615 | NP_006352 | G-T | V78L  | 1.552  | Neutral     |
| rs763353615 | NP_006352 | C-T | T73M  | -1.882 | Neutral     |
| rs774579054 | NP_006352 | G-T | G72V  | -1.918 | Neutral     |
| rs750621041 | NP_006352 | C-T | P70L  | -2.255 | Neutral     |
| rs370934116 | NP_006352 | C-A | P70T  | -0.825 | Neutral     |
| rs766443552 | NP_006352 | G-T | V69L  | -0.842 | Neutral     |
| rs587780161 | NP_006352 | C-T | P67S  | -0.805 | Neutral     |
| rs778843798 | NP_006352 | T-C | C66R  | -4.527 | Deleterious |
| rs199813155 | NP_006352 | G-A | C63Y  | -4.179 | Deleterious |
| rs758166293 | NP_006352 | T-G | C63G  | -4.117 | Deleterious |
| rs568967699 | NP_006352 | A-T | K61M  | -2.423 | Neutral     |
| rs770620686 | NP_006352 | C-T | P59L  | -1.999 | Neutral     |
| rs745306184 | NP_006352 | G-T | A57S  | -0.017 | Neutral     |
| rs769074510 | NP_006352 | C-T | P54S  | -0.417 | Neutral     |
| rs11551892  | NP_006352 | G-C | A49P  | 0.228  | Neutral     |
| rs748333323 | NP_006352 | A-G | N47S  | 0.712  | Neutral     |
| rs199799743 | NP_006352 | C-T | T41M  | -0.582 | Neutral     |
| rs773491778 | NP_006352 | C-A | A39E  | -1.178 | Neutral     |

|                    |           |     |      |        |         |
|--------------------|-----------|-----|------|--------|---------|
| <b>rs760874697</b> | NP_006352 | G-T | A39S | 0.481  | Neutral |
| <b>rs587780160</b> | NP_006352 | C-A | A38E | -1.433 | Neutral |
| <b>rs550726919</b> | NP_006352 | C-A | H36N | -1.335 | Neutral |
| <b>rs79344505</b>  | NP_006352 | C-A | L33M | -0.184 | Neutral |
| <b>rs758169931</b> | NP_006352 | C-G | S31C | -0.623 | Neutral |
| <b>rs561048036</b> | NP_006352 | C-G | H30Q | -1.909 | Neutral |
| <b>rs751338230</b> | NP_006352 | A-G | H30R | -2.13  | Neutral |
| <b>rs756970136</b> | NP_006352 | G-T | A29S | -0.24  | Neutral |
| <b>rs587780165</b> | NP_006352 | G-A | R25Q | -1.319 | Neutral |
| <b>rs780947625</b> | NP_006352 | G-A | G24R | -1.286 | Neutral |
| <b>rs745392080</b> | NP_006352 | G-A | G23E | 0.537  | Neutral |
| <b>rs769323553</b> | NP_006352 | G-A | G23R | 0.154  | Neutral |
| <b>rs539706443</b> | NP_006352 | G-A | G22R | -1.486 | Neutral |
| <b>rs772484566</b> | NP_006352 | C-T | A21V | -1.81  | Neutral |
| <b>rs747307642</b> | NP_006352 | C-T | T8I  | -0.308 | Neutral |
| <b>rs771173385</b> | NP_006352 | A-T | Y6F  | -0.009 | Neutral |
| <b>rs776869015</b> | NP_006352 | G-T | G4V  | -0.234 | Neutral |
| <b>rs546307661</b> | NP_006352 | C-A | P3T  | -0.486 | Neutral |

172

173

174

175

176

177

178

179

180

181

182

183

184

185

186

187



**Table S5. List of nsSNP's predicted by nsSNPAnalyzer as deleterious**

| Variant ID  | Nucleotide Variation | SNP          | nsSNPAnalyzer Predictions |             |              |              |           |                        |
|-------------|----------------------|--------------|---------------------------|-------------|--------------|--------------|-----------|------------------------|
|             |                      |              | Phenotype                 | Environment | Area Buried  | Frac. Polar  | Secondstr | ScopLink               |
| rs752722523 | G-A                  | A282T        | Neutral                   | -           | -            | -            | -         | -                      |
| rs763960333 | G-C                  | S281T        | Neutral                   | -           | -            | -            | -         | -                      |
| rs200997384 | G-T                  | V278L        | Neutral                   | -           | -            | -            | -         | -                      |
| rs191886930 | G-A                  | A276T        | Neutral                   | -           | -            | -            | -         | -                      |
| rs761914407 | C-T                  | <b>R215C</b> | <b>Disease</b>            | <b>P2C</b>  | <b>0.177</b> | <b>0.812</b> | <b>C</b>  | <a href="#">d1ahdp</a> |
| rs145059285 | G-A                  | A212T        | Neutral                   | -           | -            | -            | -         | -                      |
| rs758190709 | C-T                  | A210V        | Neutral                   | -           | -            | -            | -         | -                      |
| rs766169510 | G-C                  | Q205H        | Neutral                   | -           | -            | -            | -         | -                      |
| rs761530565 | A-G                  | Q205R        | Neutral                   | -           | -            | -            | -         | -                      |
| rs750945370 | G-T                  | A200S        | Neutral                   | -           | -            | -            | -         | -                      |
| rs756654236 | G-A                  | A197T        | Neutral                   | -           | -            | -            | -         | -                      |
| rs780355420 | T-A                  | F194I        | Neutral                   | -           | -            | -            | -         | -                      |
| rs779330626 | A-G                  | <b>Q188R</b> | <b>Disease</b>            | -           | -            | -            | -         | -                      |
| rs748353425 | G-A                  | <b>M182I</b> | <b>Disease</b>            | -           | -            | -            | -         | -                      |
| rs772349818 | T-C                  | M182T        | Neutral                   | -           | -            | -            | -         | -                      |
| rs570681642 | A-G                  | <b>Q181R</b> | <b>Disease</b>            | -           | -            | -            | -         | -                      |
| rs777986934 | G-T                  | <b>G177V</b> | <b>Disease</b>            | -           | -            | -            | -         | -                      |
| rs539086211 | G-A                  | <b>G176D</b> | <b>Disease</b>            | -           | -            | -            | -         | -                      |
| rs747003841 | G-C                  | <b>G176R</b> | <b>Disease</b>            | -           | -            | -            | -         | -                      |
| rs148649390 | G-T                  | A175S        | Neutral                   | -           | -            | -            | -         | -                      |
| rs587780164 | G-A                  | <b>D167N</b> | <b>Disease</b>            | -           | -            | -            | -         | -                      |
| rs751081605 | C-G                  | <b>S162C</b> | <b>Disease</b>            | -           | -            | -            | -         | -                      |
| rs587780163 | C-T                  | A154V        | Neutral                   | -           | -            | -            | -         | -                      |
| rs766929278 | G-T                  | <b>G153V</b> | <b>Disease</b>            | -           | -            | -            | -         | -                      |
| rs754280897 | G-A                  | G153S        | Neutral                   | -           | -            | -            | -         | -                      |
| rs140373548 | C-A                  | <b>L152M</b> | <b>Disease</b>            | -           | -            | -            | -         | -                      |
| rs587780162 | G-A                  | V146M        | Neutral                   | -           | -            | -            | -         | -                      |
| rs556045007 | C-T                  | <b>A141V</b> | <b>Disease</b>            | -           | -            | -            | -         | -                      |
| rs575899185 | G-C                  | <b>Q138H</b> | <b>Disease</b>            | -           | -            | -            | -         | -                      |
| rs770891609 | A-C                  | <b>Y137S</b> | <b>Disease</b>            | -           | -            | -            | -         | -                      |
| rs745800027 | A-C                  | T136P        | Neutral                   | -           | -            | -            | -         | -                      |
| rs769634543 | G-A                  | <b>G135E</b> | <b>Disease</b>            | -           | -            | -            | -         | -                      |
| rs775273363 | C-T                  | <b>A128V</b> | <b>Disease</b>            | -           | -            | -            | -         | -                      |
| rs762666370 | C-G                  | <b>P124R</b> | <b>Disease</b>            | -           | -            | -            | -         | -                      |
| rs201428095 | G-A                  | <b>R123H</b> | <b>Disease</b>            | -           | -            | -            | -         | -                      |
| rs8556      | C-A                  | <b>S122R</b> | <b>Disease</b>            | -           | -            | -            | -         | -                      |
| rs766909225 | C-G                  | P121A        | Neutral                   | -           | -            | -            | -         | -                      |

|             |     |       |         |   |   |   |   |   |
|-------------|-----|-------|---------|---|---|---|---|---|
| rs760111060 | G-A | G117E | Disease | - | - | - | - | - |
| rs533641489 | G-A | G117R | Disease | - | - | - | - | - |
| rs764401781 | C-T | T115M | Disease | - | - | - | - | - |
| rs751698154 | C-A | P114T | Neutral | - | - | - | - | - |
| rs781117900 | C-A | A111E | Neutral | - | - | - | - | - |
| rs745889927 | G-A | A111T | Neutral | - | - | - | - | - |
| rs370361482 | C-G | P110A | Neutral | - | - | - | - | - |
| rs774095240 | C-T | A108V | Neutral | - | - | - | - | - |
| rs747755369 | G-C | A107P | Neutral | - | - | - | - | - |
| rs771674803 | T-G | L106R | Neutral | - | - | - | - | - |
| rs140492479 | C-T | T105I | Disease | - | - | - | - | - |
| rs760196832 | C-T | A103V | Neutral | - | - | - | - | - |
| rs763448911 | C-T | A101V | Disease | - | - | - | - | - |
| rs764359688 | C-A | P99T  | Neutral | - | - | - | - | - |
| rs751865027 | T-A | L97Q  | Neutral | - | - | - | - | - |
| rs757433384 | C-A | L97M  | Neutral | - | - | - | - | - |
| rs756135357 | G-A | R94Q  | Neutral | - | - | - | - | - |
| rs780012601 | T-G | S93A  | Neutral | - | - | - | - | - |
| rs778563157 | G-A | G85D  | Disease | - | - | - | - | - |
| rs529392210 | G-A | G85S  | Neutral | - | - | - | - | - |
| rs138213197 | G-A | G84E  | Disease | - | - | - | - | - |
| rs772962401 | A-G | Y80C  | Disease | - | - | - | - | - |
| rs746542615 | G-T | V78L  | Neutral | - | - | - | - | - |
| rs763353615 | C-T | T73M  | Disease | - | - | - | - | - |
| rs774579054 | G-T | G72V  | Disease | - | - | - | - | - |
| rs750621041 | C-T | P70L  | Disease | - | - | - | - | - |
| rs370934116 | C-A | P70T  | Disease | - | - | - | - | - |
| rs766443552 | G-T | V69L  | Disease | - | - | - | - | - |
| rs587780161 | C-T | P67S  | Neutral | - | - | - | - | - |
| rs778843798 | T-C | C66R  | Disease | - | - | - | - | - |
| rs199813155 | G-A | C63Y  | Disease | - | - | - | - | - |
| rs758166293 | T-G | C63G  | Neutral | - | - | - | - | - |
| rs568967699 | A-T | K61M  | Disease | - | - | - | - | - |
| rs770620686 | C-T | P59L  | Disease | - | - | - | - | - |
| rs745306184 | G-T | A57S  | Neutral | - | - | - | - | - |
| rs769074510 | C-T | P54S  | Neutral | - | - | - | - | - |
| rs11551892  | G-C | A49P  | Neutral | - | - | - | - | - |
| rs748333323 | A-G | N47S  | Neutral | - | - | - | - | - |
| rs199799743 | C-T | T41M  | Disease | - | - | - | - | - |
| rs773491778 | C-A | A39E  | Disease | - | - | - | - | - |
| rs760874697 | G-T | A39S  | Neutral | - | - | - | - | - |

|                    |     |             |                |   |   |   |   |   |
|--------------------|-----|-------------|----------------|---|---|---|---|---|
| <b>rs587780160</b> | C-A | <b>A38E</b> | <b>Disease</b> | - | - | - | - | - |
| <b>rs550726919</b> | C-A | H36N        | Neutral        | - | - | - | - | - |
| <b>rs79344505</b>  | C-A | <b>L33M</b> | <b>Disease</b> | - | - | - | - | - |
| <b>rs758169931</b> | C-G | <b>S31C</b> | <b>Disease</b> | - | - | - | - | - |
| <b>rs561048036</b> | C-G | <b>H30Q</b> | <b>Disease</b> | - | - | - | - | - |
| <b>rs751338230</b> | A-G | <b>H30R</b> | <b>Disease</b> | - | - | - | - | - |
| <b>rs756970136</b> | G-T | A29S        | Neutral        | - | - | - | - | - |
| <b>rs587780165</b> | G-A | <b>R25Q</b> | <b>Disease</b> | - | - | - | - | - |
| <b>rs780947625</b> | G-A | <b>G24R</b> | <b>Disease</b> | - | - | - | - | - |
| <b>rs745392080</b> | G-A | G23E        | Neutral        | - | - | - | - | - |
| <b>rs769323553</b> | G-A | <b>G23R</b> | <b>Disease</b> | - | - | - | - | - |
| <b>rs539706443</b> | G-A | <b>G22R</b> | <b>Disease</b> | - | - | - | - | - |
| <b>rs772484566</b> | C-T | <b>A21V</b> | <b>Disease</b> | - | - | - | - | - |
| <b>rs747307642</b> | C-T | <b>T8I</b>  | <b>Disease</b> | - | - | - | - | - |
| <b>rs771173385</b> | A-T | Y6F         | Neutral        | - | - | - | - | - |
| <b>rs776869015</b> | G-T | <b>G4V</b>  | <b>Disease</b> | - | - | - | - | - |
| <b>rs546307661</b> | C-A | <b>P3T</b>  | <b>Disease</b> | - | - | - | - | - |

188

189

190

191

192

193

194

195

196

197

198

199

200

201

202

203

204

**Table S6. List of nsSNP's predicted by PhD-SNP server as deleterious**

| Variant ID  | Nucleotide Variation | AA Variation | PhD-SNP Sequence & Profilebased Prediction | RI |
|-------------|----------------------|--------------|--------------------------------------------|----|
| rs752722523 | G-A                  | A282T        | Neutral                                    | 8  |
| rs763960333 | G-C                  | S281T        | Neutral                                    | 8  |
| rs200997384 | G-T                  | V278L        | Neutral                                    | 9  |
| rs191886930 | G-A                  | A276T        | Neutral                                    | 6  |
| rs761914407 | C-T                  | R215C        | Disease                                    | 7  |
| rs145059285 | G-A                  | A212T        | Neutral                                    | 7  |
| rs758190709 | C-T                  | A210V        | Neutral                                    | 5  |
| rs766169510 | G-C                  | Q205H        | Neutral                                    | 8  |
| rs761530565 | A-G                  | Q205R        | Neutral                                    | 7  |
| rs750945370 | G-T                  | A200S        | Neutral                                    | 5  |
| rs756654236 | G-A                  | A197T        | Neutral                                    | 5  |
| rs780355420 | T-A                  | F194I        | Neutral                                    | 4  |
| rs779330626 | A-G                  | Q188R        | Disease                                    | 0  |
| rs748353425 | G-A                  | M182I        | Neutral                                    | 5  |
| rs772349818 | T-C                  | M182T        | Disease                                    | 0  |
| rs570681642 | A-G                  | Q181R        | Neutral                                    | 0  |
| rs777986934 | G-T                  | G177V        | Disease                                    | 8  |
| rs539086211 | G-A                  | G176D        | Neutral                                    | 3  |
| rs747003841 | G-C                  | G176R        | Disease                                    | 1  |
| rs148649390 | G-T                  | A175S        | Neutral                                    | 7  |
| rs587780164 | G-A                  | D167N        | Neutral                                    | 6  |
| rs751081605 | C-G                  | S162C        | Neutral                                    | 5  |
| rs587780163 | C-T                  | A154V        | Neutral                                    | 6  |
| rs766929278 | G-T                  | G153V        | Disease                                    | 1  |
| rs754280897 | G-A                  | G153S        | Neutral                                    | 6  |
| rs140373548 | C-A                  | L152M        | Neutral                                    | 4  |
| rs587780162 | G-A                  | V146M        | Neutral                                    | 6  |
| rs556045007 | C-T                  | A141V        | Neutral                                    | 1  |
| rs575899185 | G-C                  | Q138H        | Disease                                    | 6  |
| rs770891609 | A-C                  | Y137S        | Disease                                    | 8  |
| rs745800027 | A-C                  | T136P        | Neutral                                    | 7  |
| rs769634543 | G-A                  | G135E        | Neutral                                    | 7  |
| rs775273363 | C-T                  | A128V        | Neutral                                    | 1  |
| rs762666370 | C-G                  | P124R        | Neutral                                    | 7  |
| rs201428095 | G-A                  | R123H        | Disease                                    | 4  |
| rs8556      | C-A                  | S122R        | Disease                                    | 1  |
| rs766909225 | C-G                  | P121A        | Neutral                                    | 8  |
| rs760111060 | G-A                  | G117E        | Neutral                                    | 7  |

|             |     |       |         |   |
|-------------|-----|-------|---------|---|
| rs533641489 | G-A | G117R | Neutral | 7 |
| rs764401781 | C-T | T115M | Neutral | 7 |
| rs751698154 | C-A | P114T | Neutral | 8 |
| rs781117900 | C-A | A111E | Neutral | 2 |
| rs745889927 | G-A | A111T | Neutral | 7 |
| rs370361482 | C-G | P110A | Neutral | 7 |
| rs774095240 | C-T | A108V | Neutral | 7 |
| rs747755369 | G-C | A107P | Neutral | 0 |
| rs771674803 | T-G | L106R | Neutral | 1 |
| rs140492479 | C-T | T105I | Neutral | 7 |
| rs760196832 | C-T | A103V | Neutral | 7 |
| rs763448911 | C-T | A101V | Neutral | 6 |
| rs764359688 | C-A | P99T  | Neutral | 7 |
| rs751865027 | T-A | L97Q  | Disease | 3 |
| rs757433384 | C-A | L97M  | Neutral | 6 |
| rs756135357 | G-A | R94Q  | Neutral | 3 |
| rs780012601 | T-G | S93A  | Neutral | 6 |
| rs778563157 | G-A | G85D  | Neutral | 2 |
| rs529392210 | G-A | G85S  | Neutral | 6 |
| rs138213197 | G-A | G84E  | Disease | 4 |
| rs772962401 | A-G | Y80C  | Disease | 7 |
| rs746542615 | G-T | V78L  | Neutral | 9 |
| rs763353615 | C-T | T73M  | Neutral | 7 |
| rs774579054 | G-T | G72V  | Neutral | 6 |
| rs750621041 | C-T | P70L  | Neutral | 8 |
| rs370934116 | C-A | P70T  | Neutral | 6 |
| rs766443552 | G-T | V69L  | Neutral | 7 |
| rs587780161 | C-T | P67S  | Neutral | 8 |
| rs778843798 | T-C | C66R  | Neutral | 1 |
| rs199813155 | G-A | C63Y  | Neutral | 0 |
| rs758166293 | T-G | C63G  | Neutral | 5 |
| rs568967699 | A-T | K61M  | Neutral | 5 |
| rs770620686 | C-T | P59L  | Neutral | 7 |
| rs745306184 | G-T | A57S  | Neutral | 8 |
| rs769074510 | C-T | P54S  | Neutral | 7 |
| rs11551892  | G-C | A49P  | Neutral | 8 |
| rs748333323 | A-G | N47S  | Neutral | 9 |
| rs199799743 | C-T | T41M  | Neutral | 7 |
| rs773491778 | C-A | A39E  | Neutral | 5 |
| rs760874697 | G-T | A39S  | Neutral | 8 |
| rs587780160 | C-A | A38E  | Neutral | 3 |

|             |     |      |         |   |
|-------------|-----|------|---------|---|
| rs550726919 | C-A | H36N | Neutral | 8 |
| rs79344505  | C-A | L33M | Neutral | 6 |
| rs758169931 | C-G | S31C | Neutral | 8 |
| rs561048036 | C-G | H30Q | Neutral | 4 |
| rs751338230 | A-G | H30R | Neutral | 4 |
| rs756970136 | G-T | A29S | Neutral | 7 |
| rs587780165 | G-A | R25Q | Neutral | 3 |
| rs780947625 | G-A | G24R | Neutral | 2 |
| rs745392080 | G-A | G23E | Neutral | 6 |
| rs769323553 | G-A | G23R | Neutral | 4 |
| rs539706443 | G-A | G22R | Neutral | 3 |
| rs772484566 | C-T | A21V | Neutral | 7 |
| rs747307642 | C-T | T8I  | Neutral | 5 |
| rs771173385 | A-T | Y6F  | Neutral | 9 |
| rs776869015 | G-T | G4V  | Neutral | 4 |
| rs546307661 | C-A | P3T  | Neutral | 9 |

205

| Table S7. PolymiRTS database results |                  |              |               |                |                       |
|--------------------------------------|------------------|--------------|---------------|----------------|-----------------------|
| dbSNP ID                             | miR ID           | Conservation | miRSite       | Function Class | context+ score change |
| rs8064432                            | hsa-miR-30a-3p   | 6            | gaaACTGAAActt | D              | -0.124                |
|                                      | hsa-miR-30d-3p   | 6            | gaaACTGAAActt | D              | -0.124                |
|                                      | hsa-miR-30e-3p   | 6            | gaaACTGAAActt | D              | -0.124                |
| rs8082520                            | hsa-miR-4749-3p  | 2            | caaGAGGGGctgc | C              | -0.247                |
|                                      | hsa-miR-6769a-3p | 3            | caagAGGGGCTgc | C              | -0.168                |
|                                      | hsa-miR-4691-3p  | 4            | caagaGTGGCTGc | D              | -0.166                |
|                                      | hsa-miR-6777-3p  | 2            | caAGAGTGGctgc | D              | -0.186                |
| rs116931900                          | hsa-miR-4761-5p  | 13           | ggtgaCACCTTGg | C              | -0.124                |
| rs145426191                          | hsa-miR-6802-3p  | 5            | tgcGGGCTGAccc | D              | -0.168                |
|                                      | hsa-miR-6879-3p  | 10           | tgcgGGGTGACcc | D              | -0.141                |
|                                      | hsa-miR-4690-3p  | 5            | tgcGGGCTGAccc | C              | -0.13                 |
|                                      | hsa-miR-5685     | 5            | tgcGGGCTGAccc | C              | -0.127                |
| rs79812861                           | hsa-miR-6872-3p  | 2            | agcGGCATGGtgc | D              | -0.11                 |
|                                      | hsa-miR-767-5p   | 5            | agcggcATGGTGC | D              | -0.054                |
| rs61123825                           | hsa-miR-4286     | 3            | tGTGGGAaggggg | D              | -0.098                |
|                                      | hsa-miR-6887-3p  | 3            | tgtggGAGGGGg  | D              | -0.148                |
|                                      | hsa-miR-1260a    | 3            | tGTGGGAaggggg | C              | -0.08                 |
|                                      | hsa-miR-1260b    | 3            | tGTGGGAaggggg | C              | -0.08                 |
|                                      | hsa-miR-188-3p   | 3            | TGTGGGAaggggg | C              | -0.207                |
|                                      | hsa-miR-3127-3p  | 4            | tgtggGAAGGGGg | C              | -0.171                |

|                    |                        |    |                                 |   |        |
|--------------------|------------------------|----|---------------------------------|---|--------|
|                    | hsa-miR-3156-3p        | 3  | tGTGGGA <b>A</b> Aggggg         | C | -0.092 |
|                    | hsa-miR-6734-3p        | 2  | tgtGGGA <b>A</b> AGGggg         | C | -0.121 |
|                    | hsa-miR-6756-3p        | 3  | tgtggGA <b>A</b> AGGGGg         | C | -0.143 |
| <b>rs148791210</b> | <b>hsa-miR-1321</b>    | 21 | aacc <b>CCT</b> CCCTc           | D | -0.076 |
|                    | <b>hsa-miR-4739</b>    | 21 | aacc <b>CCT</b> CCCTc           | D | -0.085 |
|                    | <b>hsa-miR-4756-5p</b> | 21 | aacc <b>CCT</b> CCCTc           | D | -0.104 |
| <b>rs142428986</b> | hsa-miR-3609           | 2  | caggTC <b>ACT</b> TTct          | D | 0.057  |
|                    | hsa-miR-548ah-5p       | 2  | caggTC <b>ACT</b> TTct          | D | 0.048  |
|                    | hsa-miR-4670-5p        | 3  | caGGTC <b>G</b> CTttct          | C | -0.285 |
| <b>rs8065028</b>   | hsa-miR-3609           | 2  | agcagg <b>TC</b> ACTTT          | C | 0.057  |
|                    | hsa-miR-548ah-5p       | 2  | agcagg <b>TC</b> ACTTT          | C | 0.048  |
|                    | hsa-miR-3677-5p        | 3  | agcaGG <b>CC</b> ACTtt          | D | -0.212 |
|                    | hsa-miR-4796-3p        | 2  | agcagg <b>CC</b> ACTTT          | D | 0.029  |
| <b>rs8065051</b>   | <b>hsa-miR-3619-3p</b> | 6  | gccccg <b>TGG</b> TCCA          | C | -0.121 |
|                    | <b>hsa-miR-4776-5p</b> | 6  | gccccg <b>TGG</b> TCCA          | C | -0.127 |
|                    | <b>hsa-miR-744-5p</b>  | 2  | GCCCCG <b>C</b> ggtcca          | D | -0.286 |
| <b>rs8069252</b>   | hsa-miR-660-3p         | 7  | acgAGG <b>AGG</b> Agga          | C | -0.122 |
|                    | hsa-miR-6749-3p        | 22 | acgagg <b>G</b> GGAGGA          | D | -0.177 |
| <b>rs189589365</b> | hsa-miR-499b-5p        | 2  | cctgAA <b>G</b> TCTGga          | D | 0.027  |
|                    | hsa-miR-205-3p         | 6  | cCTGAA <b>A</b> Tctgga          | C | 0.127  |
|                    | hsa-miR-488-5p         | 2  | cctgaa <b>A</b> TCTGGA          | C | -0.01  |
| <b>rs1056656</b>   | <b>hsa-miR-1270</b>    | 2  | TCTCCA <b>A</b> gattga          | C | 0.001  |
|                    | <b>hsa-miR-4531</b>    | 2  | TCTCCA <b>A</b> gattga          | C | -0.065 |
|                    | <b>hsa-miR-620</b>     | 2  | TCTCCA <b>A</b> gattga          | C | 0.001  |
| <b>rs184053751</b> | hsa-miR-6777-3p        | 2  | ggcAGA <b>G</b> TGGtgc          | D | -0.001 |
| <b>rs144241488</b> | hsa-miR-3912-5p        | 3  | aggTGG <b>A</b> CAAttg          | D | -0.075 |
|                    | hsa-miR-1224-3p        | 2  | AGGTGG <b>G</b> caattg          | C | -0.156 |
| <b>rs187003057</b> | hsa-miR-4251           | 21 | cattt <b>TT</b> CTCAGc          | D | -0.091 |
|                    | hsa-miR-539-5p         | 21 | catt <b>TTT</b> CTCAGc          | D | 0.026  |
|                    | hsa-miR-3662           | 21 | CAT <b>TTT</b> Actcagc          | C | 0.103  |
|                    | hsa-miR-8077           | 21 | cattt <b>ACT</b> CAGC           | C | -0.173 |
| <b>rs146552906</b> | hsa-miR-4777-5p        | 8  | tttct <b>A</b> TCTAGAg          | D | -0.136 |
|                    | hsa-miR-517-5p         | 8  | tttcta <b>T</b> CTAGAG          | D | -0.18  |
|                    | hsa-miR-196a-5p        | 9  | tttCTA <b>C</b> CTAgag          | C | -0.136 |
|                    | hsa-miR-196b-5p        | 9  | tttCTA <b>C</b> CTAgag          | C | -0.133 |
|                    | hsa-miR-3927-3p        | 9  | ttTCTA <b>C</b> CTAgag          | C | -0.359 |
|                    | hsa-miR-4650-3p        | 11 | t <b>TT</b> CTA <b>C</b> ctagag | C | -0.216 |
|                    | hsa-miR-6831-5p        | 9  | ttTCTA <b>C</b> CTAgag          | C | -0.391 |
| <b>rs2280354</b>   | hsa-miR-4777-5p        | 8  | tttct <b>A</b> TCTAGA           | D | -0.136 |
|                    | hsa-miR-4305           | 8  | tttct <b>TG</b> TCTAGA          | C | -0.256 |
|                    | hsa-miR-4524b-3p       | 9  | ttt <b>CTG</b> TCTAga           | C | -0.087 |

|                    |                        |   |                         |   |        |
|--------------------|------------------------|---|-------------------------|---|--------|
| <b>rs192244427</b> | hsa-miR-3165           | 5 | acTCCA <b>CC</b> Agggt  | D | -0.13  |
|                    | hsa-miR-4456           | 6 | actCCA <b>CC</b> AGggt  | D | -0.165 |
|                    | hsa-miR-6880-5p        | 4 | aCTCCA <b>CC</b> Agggt  | D | -0.34  |
|                    | hsa-miR-8071           | 5 | acTCCA <b>CC</b> Agggt  | D | -0.137 |
|                    | hsa-miR-1287-5p        | 5 | acTCCA <b>G</b> CAgggt  | C | -0.123 |
|                    | hsa-miR-3135b          | 4 | aCTCCA <b>G</b> CAgggt  | C | -0.302 |
|                    | hsa-miR-3692-5p        | 6 | actCCA <b>G</b> CAGggt  | C | -0.158 |
|                    | hsa-miR-370-3p         | 3 | actcCA <b>G</b> CAGGgt  | C | -0.154 |
|                    | hsa-miR-6893-3p        | 3 | actcCA <b>G</b> CAGGgt  | C | -0.135 |
| <b>rs183620920</b> | <b>hsa-miR-6755-3p</b> | 2 | GACAAC <b>A</b> cccttc  | D | -0.068 |
| <b>rs187442839</b> | hsa-miR-27a-5p         | 2 | cAAGCC <b>C</b> Aggctg  | D | -0.112 |
|                    | hsa-miR-378g           | 2 | caAGCC <b>C</b> AGgctg  | D | -0.14  |
|                    | hsa-miR-661            | 2 | caagCC <b>C</b> AGGctg  | D | -0.2   |
|                    | hsa-miR-939-3p         | 2 | caaGCC <b>C</b> AGGctg  | D | -0.193 |
|                    | hsa-miR-212-5p         | 2 | caaGCC <b>A</b> AGGctg  | C | -0.159 |
| <b>rs141179592</b> | hsa-miR-1343-3p        | 3 | gaCCAG <b>G</b> AAcctg  | D | -0.078 |
|                    | hsa-miR-6783-3p        | 3 | gaCCAG <b>G</b> AAcctg  | D | -0.088 |
|                    | hsa-miR-3663-5p        | 4 | GACCAG <b>A</b> aacctg  | C | -0.183 |
|                    | hsa-miR-7152-3p        | 4 | GACCAG <b>A</b> aacctg  | C | -0.136 |
| <b>rs144967504</b> | hsa-miR-1343-3p        | 3 | ggaga <b>C</b> CAGGAAc  | D | -0.078 |
|                    | hsa-miR-3663-5p        | 4 | ggAGAC <b>C</b> CAGgaac | D | -0.085 |
|                    | hsa-miR-6783-3p        | 3 | ggaga <b>C</b> CAGGAAc  | D | -0.088 |
|                    | hsa-miR-6843-3p        | 4 | gGAGAC <b>C</b> Aggaac  | D | -0.056 |
|                    | hsa-miR-6848-3p        | 4 | gGAGAC <b>C</b> Aggaac  | D | -0.111 |
|                    | hsa-miR-1238-3p        | 3 | ggaga <b>C</b> GAGGAAc  | C | -0.105 |
|                    | hsa-miR-4326           | 3 | ggagac <b>G</b> AGGAAC  | C | -0.166 |

206

207

**Table S8. Results of template structure search (NCBI psiBLAST)**

| S. No    | PDB ID | AA Length | Identity (%) | Chain | Query cover (%) | Total Score | E-Value |
|----------|--------|-----------|--------------|-------|-----------------|-------------|---------|
| <b>1</b> | 2LD5   | 67        | 78           | A     | 23              | 118         | 7E-34   |
| <b>2</b> | 2L7Z   | 67        | 78           | A     | 23              | 118         | 7E-34   |
| <b>3</b> | 2CRA   | 58        | 100          | A     | 20              | 112         | 1E-31   |

208

209

210

211

212



213 **MODELLER v9.17 Python Scripts**

214 **“script2.py”**

```
215 from modeller import *
216 env = environ()
217 aln = alignment(env)
218 for (pdb, chain) in (('2cra', 'A'), ('2l7z', 'A'), ('2ld5', 'A')):
219     m = model(env, file=pdb, model_segment=('FIRST:'+chain, 'LAST:'+chain))
220     aln.append_model(m, atom_files=pdb, align_codes=pdb+chain)
221 aln.malign()
222 aln.malign3d()
223 aln.compare_structures()
224 aln.id_table(matrix_file='family.mat')
225 env.dendrogram(matrix_file='family.mat', cluster_cut=-1.0)
```

226

227 **“script3.py”**

```
228 from modeller import *
229 env = environ()
230 aln = alignment(env)
231 mdl = model(env, file='2l7z', model_segment=('FIRST:A', 'LAST:A'))
232 aln.append_model(mdl, align_codes='2l7z', atom_files='2l7z.pdb')
233 aln.append(file='hoxb13.ali', align_codes='hoxb13')
234 aln.align2d()
235 aln.write(file='hoxb13-2l7z.ali', alignment_format='PIR')
236 aln.write(file='hoxb13-2l7z.pap', alignment_format='PAP')
```

237

238 **“script4.py”**

```
239 from modeller import *
240 from modeller.automodel import *
241 #from modeller import soap_protein_od
242 env = environ()
```

```
243 a = automodel(env, alnfile='hoxb13-217z.ali',
244             knowns='217z', sequence='hoxb13',
245             assess_methods=(assess.DOPE,
246                 #soap_protein_od.Scorer(),
247                 assess.GA341))
```

```
248 a.starting_model = 1
```

```
249 a.ending_model = 30
```

```
250 a.make()
```

```
251
```

```
252
```

```
253
```

```
254
```

```
255
```

```
256
```

```
257
```

```
258
```

```
259
```

```
260
```

```
261
```

```
262
```

```
263
```

```
264
```

```
265
```

```
266
```

```
267
```

```
268
```

```
269
```

```
270
```

```
271
```

```
272
```

273

### Supplementary Figures

274

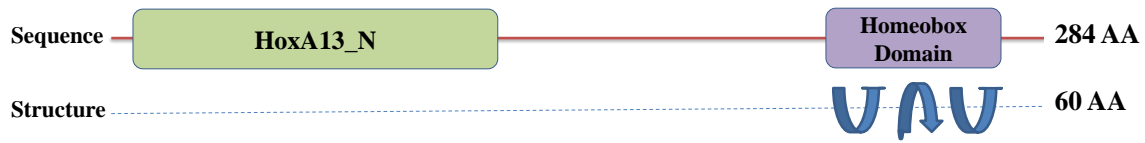

275

276 **Figure S1. A graphical representation of the functional domains in the *HOXB13* protein.** The figure  
277 depicts the location of the corresponding domains of *HOXB13* with insights into its secondary structure. It  
278 consists of two functional domains – Homeobox binding domain and HOXA13 N-terminal domain.

279

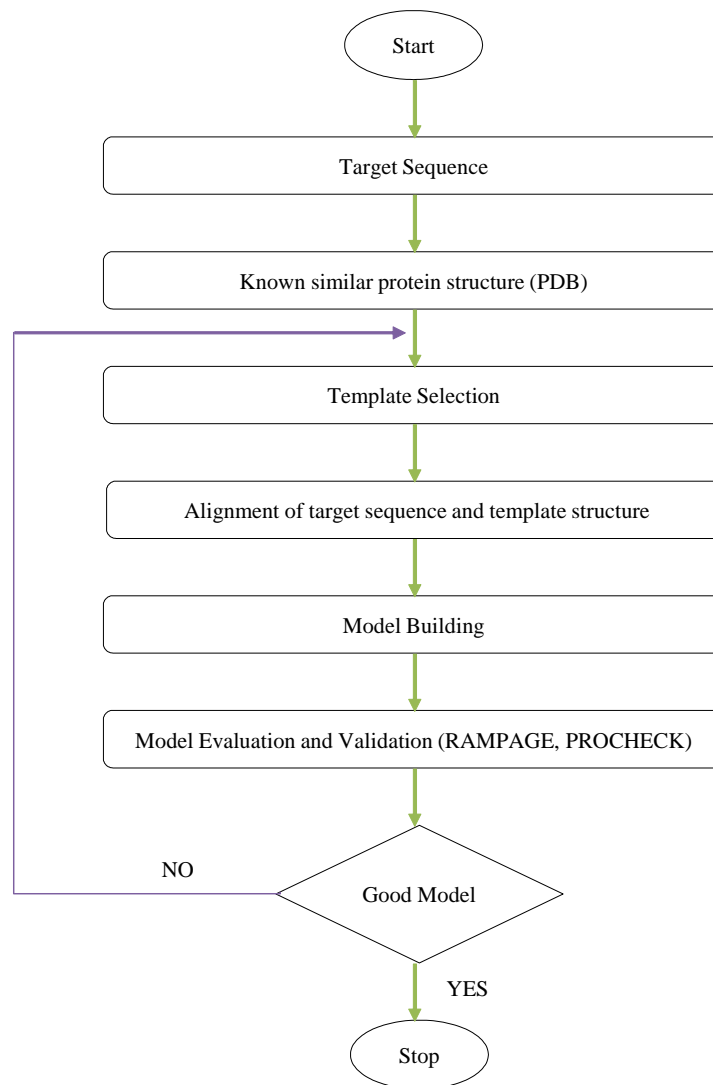

280

281 **Figure S2. Steps in Homology Modelling.** The figure depicts the work flow involved in the modelling of  
282 complete *HOXB13* protein using MODELLER v9.17

| Predict Not Tolerated                 | Position      | Seq Rep | Predict Tolerated                            |
|---------------------------------------|---------------|---------|----------------------------------------------|
| y w v t s r q p n l k i h g f e d c a | 1M            | 0.11    | M                                            |
| c w m f i y l v h r g t n s p a k q   | 2E            | 0.11    | D E                                          |
| w h y f m i r q c l e k v d t g       | 3P            | 0.15    | N S A P                                      |
| w m y f h i c q r l e v k n t d s a   | 4G            | 0.15    | P G                                          |
|                                       | w             | 5N      | 0.18 c y m h i F v l P g r q D A e T N S K   |
|                                       |               | 6Y      | 0.19 c w p m d k q n g r i t s E v A H I F Y |
|                                       | w f m y h     | 7A      | 0.20 c i l q e v d R k P g N s T A           |
|                                       | w             | 8T      | 0.21 c m f H y p l l r G q V d k e N A S T   |
|                                       |               | 9L      | 0.21 c w p D g n i t e s M v H R k f Q y A L |
| c w m f i y l v r h p g s k q T       | 10D           | 0.49    | A N E D                                      |
|                                       | w             | 11G     | 0.49 c f y M h I p V L G n R t q d S A K E   |
|                                       | w             | 12A     | 0.46 m c q d r h p e k I v F y L G T A S N   |
| c w f m y i h g l n t s e V D R       | 13K           | 0.46    | P Q A K                                      |
| w m f c l v y r h p q                 | 14D           | 0.46    | t k g I E S A D N                            |
| h d w e p q n e r k y a f S T         | 15I           | 0.52    | G I L V M                                    |
| w c m f i y l v r h p a k q n S       | 16E           | 0.52    | T G D E                                      |
| w m i f y l c h r q e k p t d a V     | 17G           | 0.52    | N S G                                        |
| d h c g e w r k y p q t a N m V i     | 18L           | 0.52    | S F L                                        |
|                                       | 19L           | 0.52    | w d e q n g M C K P T R S I H A F L y V      |
| w h y f i m n q r d e l k e v t S     | 20G           | 0.53    | P A G                                        |
| w m f i c l y v r p q k               | 21A           | 0.53    | n E T D H S G A                              |
| w m f i c l y v r                     | 22G           | 0.54    | h q p k A d E T S G N                        |
|                                       | 23G           | 0.56    | w c m d P e k n r i Q t G S v H L A F y      |
| w h y f m i r q e l k n v             | 24G           | 0.56    | P T D G S A C                                |
| w h y f i m e l q n d v k t p         | 25R           | 0.56    | S G E A R                                    |
| w c m f i y v p a q s g K             | 26N           | 0.56    | R T H E L D N                                |
| d c w g n e s t k y a P R v m H       | 27L           | 0.56    | F I Q L                                      |
| h w g d n r q e s k p                 | 28V           | 0.56    | f Y t A C L I V M                            |
| w h y f i m n q d e l c k             | 29A           | 0.56    | V T P G R S A                                |
| w m i f c v l y p a t q e k g d S     | 30H           | 0.56    | R N H                                        |
|                                       | 31S           | 0.43    | C w d m e k q n P g r i t v a S H L F Y      |
| w h y d n r f q e k c                 | 32P           | 0.44    | g S t i M L V P A                            |
| w d c n e q                           | 33L           | 0.56    | k r m g t H y P F i V S A L                  |
|                                       | 34T           | 0.54    | w C d P M e k q n r I S T G V A H F L y      |
| w h y f m i n q d e c k L v           | 35S           | 0.55    | T P R S G A                                  |
|                                       | w             | 36H     | 0.52 m c i f e v l q d t Y n P k R s G A H   |
| w c m d e i n r k v t g y Q L F A     | 37P           | 0.54    | H S P                                        |
| w h y f m i r d n                     | 38A           | 0.54    | e c k Q L v T P G S A                        |
| w h f m i q c e l d                   | 39A           | 0.55    | k n R v Y G P T S A                          |
|                                       | w             | 40P     | 0.47 d H r q c e m n k y f g P I S L T A v   |
| w c d e q k n r i h l M               | 41T           | 0.40    | P Y F V S T G A                              |
|                                       | 42L           | 0.53    | c w d M P e q k n G i R S T H V A F L y      |
|                                       | 43M           | 0.53    | C w d P M e k q n G r t i S V A H L f Y      |
|                                       | w c m d       | 44P     | 0.54 i g e f v n l k R Y H A T Q P S         |
| w h f i r q d e c n l k Y             | 45A           | 0.55    | P M V T A S G                                |
|                                       | 46V           | 0.55    | c w d P m e k q n r G i T S V h A L F Y      |
|                                       | w             | 47N     | 0.56 y f c m h I l P V G r N q d A k E T S   |
|                                       | 48Y           | 0.56    | c w m D k q n E r G i P T v l H A F S Y      |
|                                       | w y f c m h i | 49A     | 0.56 r n q L V k G E P D A T S               |
|                                       | w f y         | 50P     | 0.56 m h i v l C r G q P N k A S T E D       |
| w d g n r q k                         | 51L           | 0.55    | f C y E P H t M S L I A V                    |

|                                       |      |      |                                         |
|---------------------------------------|------|------|-----------------------------------------|
| we y mi h                             | 52D  | 0.55 | F l v t R n q G k A S P E D             |
|                                       | 53L  | 0.56 | w c d M e q n k P r i h T G S F y L V A |
| w e i d h n r f k l V M E T           | 54P  | 0.57 | Q G Y A S P                             |
| w y f h i c l r q n p k M E V         | 55G  | 0.50 | T D A S G                               |
|                                       | 56S  | 0.50 | w C h f I P M y G V L n r d T Q k A E S |
| w h y f i m q n r d l k c v t E       | 57A  | 0.52 | P S G A                                 |
|                                       | 58E  | 0.57 | g P l n t R Y q K D A S F E             |
| w e m i h v                           | 59P  | 0.57 | D G T S A P                             |
| w h y f m i r q c e n k L V           | 60P  | 0.58 | n q r D l E k C t V P S G A             |
|                                       | 61K  | 0.61 | P R K                                   |
| w h y f i m                           | 62Q  | 0.60 | E P T Q                                 |
| c w f m d y i v g h l t N A S E Q     | 63C  | 0.60 | C                                       |
| w c f m y i h v g n a r L d K S       | 64H  | 0.55 | v l I r G P d Q H T N e K A S           |
| w h y f i m q l e k d n v t p a R G S | 65P  | 0.54 | D E A L P                               |
|                                       | 66C  | 0.51 | A P C                                   |
| w e y f m                             | 67P  | 0.55 | L G A S P                               |
| w c f m y i h v r n t g k S Q         | 68G  | 0.60 | V L T s G P A                           |
| w h y f i m n q r d e l k t s V G     | 69V  | 0.56 | e k q n r G M h P I f S L T Y V A       |
| w h y f i m n q r d e k c v t         | 70P  | 0.51 | c m f y H d g i n l e R k Q S A T V P   |
| w m i f y n q d r e k H C             | 71Q  | 0.60 | i v l r y k H e g F P T D N A S Q       |
|                                       | 72G  | 0.61 | v l d k P N Q E R A G T S               |
| c w d                                 | 73T  | 0.62 | P A T S                                 |
| w                                     | 74S  | 0.62 | T P A S                                 |
| w e m                                 | 75P  | 0.62 | c m h i W l v q R d e G K N P A T S     |
| w y f c m h i                         | 76A  | 0.58 | G S T A                                 |
| w h f m i r q e c l d k n v Y G       | 77P  | 0.62 | k n v F g T P S A                       |
| w h y f m i r c e l d k v n g Q       | 78V  | 0.66 | M V L                                   |
|                                       | 79P  | 0.66 | S G P                                   |
| h y f m i r q d n c l k v P W E       | 80Y  | 0.67 | Y                                       |
| w h y m i r q c e l d                 | 81G  | 0.68 | S G                                     |
| d h g n e c s w r k y p q t a I F     | 82Y  | 0.68 | H Y                                     |
| w h y f m i r q l c e k d n v T a     | 83F  | 0.67 | H F                                     |
| m q h k i e t w v n s r c l d a p f G | 84G  | 0.67 | Q G                                     |
| w m i f l c y v r h q p k t e a d N   | 85G  | 0.68 | q h t k e a P d G S N                   |
| m i q v f t e c s a k l p r n d g W   | 86G  | 0.69 | P H S G                                 |
| m w q s k i y t e n v a r c d p l g   | 87Y  | 0.70 | I Y                                     |
| w f m i y h l e r v e k t p d n a S   | 88Y  | 0.70 | T F Y                                   |
|                                       | 89S  | 0.71 | a Q n D G S P                           |
| w m i f l e v y r h t k e             | 90C  | 0.73 | A C                                     |
| w h y f m n q r d i e k l t p g S V   | 91R  | 0.73 | Q R                                     |
| w f c m i y v h l d p t e n a k S G   | 92V  | 0.73 | I Y L V M                               |
|                                       | 93S  | 0.74 | Q P N V T A G S                         |
| h d n e g w e s r p k q t a f         | 94R  | 0.71 | P N Q k S T R H                         |
| w h f y m i c r l e d k               | 95S  | 0.70 | r q t k e P d A H G N S                 |
| w e f m y i v l d g e a               | 96S  | 0.71 | d T G W P N Q A S                       |
|                                       | 97L  | 0.71 | E Y V Q I L                             |
| w m i f l c v y                       | 98K  | 0.74 | E R K                                   |
| f m y i h c l r e v k                 | 99P  | 0.75 | n g D A T P S                           |
| w d c g n p k r h t S a m f           | 100C | 0.75 | A L G S C                               |
| c w f d m i y v g p s h n l a t Q     |      |      |                                         |
| w f y h m c i r l k v Q e             |      |      |                                         |
| w h y f i m n q r d e v t K P         |      |      |                                         |

| Predict Not Tolerated                 | Position | Seq Rep | Predict Tolerated                       |
|---------------------------------------|----------|---------|-----------------------------------------|
| wf y m c r e i q H d k v g            | 101A     | 0.76    | n L P S T A                             |
| w m c i                               | 102Q     | 0.77    | f r v l e k t P d n A H S G Y Q         |
| w m i f y                             | 103A     | 0.77    | l c r q v e k t H d N P S G A           |
| w h f m i q r d n e l c k Y           | 104A     | 0.78    | G T V P S A                             |
|                                       | 105T     | 0.78    | c w d e k q P r N M i G h V L T F Y S A |
|                                       | 106L     | 0.78    | c w m D k q n r P G E i t S v h A F L Y |
| w y f c h i l                         | 107A     | 0.78    | r d N Q T E M V P S K G A               |
| w c f m h                             | 108A     | 0.79    | i v l p r n G T Q Y A K S D E           |
| w                                     | 109Y     | 0.79    | c m d i n v e h g t l P F S Q A Y r K   |
| w                                     | 110P     | 0.79    | m i h c f q l n d R v k T E P Y S G A   |
| g w y h d n r f q k                   | 111A     | 0.81    | s C E P L i T A V M                     |
| w c f m i y v l h r q A P K N G       | 112E     | 0.81    | S T E D                                 |
| w f m h i l Y V n q R                 | 113T     | 0.82    | E K D C P G A S T                       |
| w y f h m c i L                       | 114P     | 0.83    | d e n Q V k G R P T A S                 |
|                                       | 115T     | 0.83    | c w d m k q n E r P I G T f S H Y L A V |
| w f m h i c r l q e k v d             | 116A     | 0.84    | N Y G T A S P                           |
| w f m y i h c r l e k v d T           | 117G     | 0.85    | P Q N A S G                             |
| c w m f i y l v r h t p g q S K       | 118E     | 0.85    | A N D E                                 |
| c w f m i y l v h g t n a k P Q       | 119E     | 0.84    | R S D E                                 |
| c w p d m e k q n r t i a S           | 120Y     | 0.84    | G H V L Y F                             |
| w h y f m i r c e l d k n v           | 121P     | 0.84    | A G Q T S P                             |
| w f m y h i c l r q e v d             | 122S     | 0.84    | P K T A N G S                           |
| w f c m d y i v l n t e s g q k P H   | 123R     | 0.84    | A R                                     |
| w f m c i y l v H e                   | 124P     | 0.85    | q d g s k T N R P A                     |
| w f c m y i d h v l p n e Q           | 125T     | 0.85    | R S G A T K                             |
| c w m f i y l v h t p n a k R Q G     | 126E     | 0.85    | D S E                                   |
| k q d n r g e p h t m a i S           | 127F     | 0.85    | W C Y V L F                             |
| w f m y h i c r l e k v p d           | 128A     | 0.86    | T Q N G S A                             |
| d h n g k r e c q s p t a w v i y L M | 129F     | 0.86    | F                                       |
| w c h q p r e t f m k v a s i g d L   | 130Y     | 0.85    | N Y                                     |
| w m i f c l y v r                     | 131P     | 0.86    | t e k a S d n G H Q P                   |
| w h y f m i r q l c e k d v n p a T   | 132G     | 0.86    | S G                                     |
| c w m e q r i n t s v a h G           | 133Y     | 0.86    | P K L D F Y                             |
| w y f m i r q d e c l n k H           | 134P     | 0.86    | V S G T A P                             |
| w f m y i h c l q e v k p d           | 135G     | 0.86    | T N R A S G                             |
| w h y f m i q c e d l n k v g T A     | 136T     | 0.86    | R S P                                   |
| h q r d e c n k w i p v l g s f A     | 137Y     | 0.86    | M T Y                                   |
| c w f m i v v l t s a n d k H P R     | 138O     | 0.86    | E G O                                   |
| w f y m c e q d i l k n               | 139P     | 0.85    | g R H V T A S P                         |
| d w c g n e k p s h q t A R i         | 140M     | 0.85    | F Y L M V                               |
| w h y f i m n q r d e l k c v T S     | 141A     | 0.86    | G A P                                   |
| m w i v f l c                         | 142S     | 0.86    | r p h t a Y k e Q n D G S               |
| h w m i q n r d e k c l f t p g V     | 143Y     | 0.86    | S A Y                                   |
| d g h n e s w k r y p q t a v C       | 144L     | 0.86    | F I M L                                 |
| m w i f v c l y r p q h t a k n E G   | 145D     | 0.86    | S D                                     |
| w h y d f n r e k c p g l t i         | 146V     | 0.85    | A S Q M V                               |
| w m c                                 | 147S     | 0.74    | q r i e d k y l N H V F g t P A S       |
| w h y d g r q f e k c p t i M S N     | 148V     | 0.74    | A L V                                   |
| g y h d n r q f e k s c p m i T W     | 149V     | 0.85    | A L V                                   |
| c w i y v h g l n F t                 | 150Q     | 0.85    | a d M k R E S Q P                       |

|                                     |      |      |                                     |
|-------------------------------------|------|------|-------------------------------------|
| wf m h c i l r q e v k p            | 151T | 0.85 | d Y N A G S T                       |
| d c e g n p k r h q t a             | 152L | 0.85 | V W M Y F S I L                     |
| wh y f i m q n d e l c k v t p R A  | 153G | 0.85 | S G                                 |
| wh y f m i q r n d l k v C P        | 154A | 0.85 | E T S G A                           |
| wf y m i c q l e d v n k            | 155P | 0.61 | T R G A S H P                       |
| wh y f i m n q r d e l k c T V      | 156G | 0.83 | A S P G                             |
| c w f m i y l v h r g s p a N K T   | 157E | 0.84 | Q D E                               |
| wh y i m r q n d l c k v T          | 158P | 0.84 | E F G S A P                         |
| c w d f m i y v g p s h n a t e L   | 159R | 0.86 | Q K R                               |
| m i w v f l c r q a t k e Y P n G   | 160H | 0.85 | S D H                               |
| w c m i f v l y t p a s k q g N     | 161D | 0.86 | R H D E                             |
| wf y m c r l e i g k d v n          | 162S | 0.85 | H Q P A S T                         |
| d c w e g n k r s h t A I F         | 163L | 0.85 | M Q V P Y L                         |
| d c g h w n y s e t a k P f v m     | 164L | 0.86 | R Q I L                             |
| wf c m y d v l e n g q a t H k      | 165P | 0.85 | I R S P                             |
| wh g d n r e s k c p f a L          | 166V | 0.85 | T Y Q I V M                         |
| c w f m i y v r g n t s a k         | 167D | 0.86 | H L P Q D E                         |
| w m f i c y l v r h e k             | 168S | 0.86 | a P d Q N T G S                     |
| c w f m i d v g s l a t n e H r     | 169Y | 0.85 | K P Q Y                             |
| c w f m i y v l g t r n s a k d H   | 170Q | 0.85 | P E Q                               |
| w y f i m q r l c e k n d v t       | 171S | 0.85 | A G H S P                           |
| f m i v h p l t d s g a n q r Y     | 172W | 0.85 | C E K W                             |
| wh y f m i r c e l d k n v g Q      | 173A | 0.85 | P S T A                             |
| wh y r c g e d q k n f m a v P      | 174L | 0.79 | S T I L                             |
| wh y f m i                          | 175A | 0.77 | r e c l d k n v Q P G S A T         |
| w m i f l v c y r q p t k e H d     | 176G | 0.80 | A G S N                             |
| wh y f i m r n d e l k c v t Q      | 177G | 0.79 | P A S G                             |
| c f m d i v p g s h l a t e q N     | 178W | 0.80 | Y R K W                             |
| m i w v f c y r q a t k e           | 179N | 0.80 | L P H S G D N                       |
| m w i f v l c y r p q t e d         | 180S | 0.80 | H N A K S G                         |
| m w i f v c l y r t a k e s H n     | 181Q | 0.80 | G P D Q                             |
| g w h n y r e s k c p t             | 182M | 0.81 | Q D F I L A M V                     |
| w m i f                             | 183C | 0.81 | v l p C h t a q r E Y s K g d N     |
| wh y f i n q r d e l k v p s T G    | 184C | 0.81 | M A C                               |
| wf y m c h i l r v                  | 185Q | 0.79 | g k d N T E Q P S A                 |
| w c f y m i h d v n t e             | 186G | 0.79 | p q s a L r G K                     |
| c w m f i y l v h r t g n s p a k q | 187E | 0.79 | D E                                 |
| wf m i y h c r l v k t n e s        | 188Q | 0.80 | D G A P Q                           |
| wf y c                              | 189N | 0.80 | m h i v l r q P K D T E A G S N     |
| w c y f m h v i t e s a g d r k     | 190P | 0.80 | L N P Q                             |
| w y f m i q r d e n c k v H L       | 191P | 0.80 | T G A S P                           |
| W m h f i                           | 192G | 0.80 | y q d l e k R C N V P T A S G       |
| c w                                 | 193P | 0.75 | m d e k Q r i N T v l G F S A P Y H |
| d c w e p k r s q t H y a           | 194F | 0.71 | v G N M i F L                       |
| h c q n e r k t d m s v p y i f a   | 195W | 0.70 | G L W                               |
| w c f y v h l p t s n a q D r E     | 196K | 0.70 | M I G K                             |
| w m i c y r q l k v p d n           | 197A | 0.72 | F H E G T A S                       |
| wh y f m i q r d n e l c k v        | 198A | 0.72 | G T P S A                           |
| c w p e n k q r s t h a m           | 199F | 0.72 | V D Y G I L F                       |
| wh y f m i r n d e l c k            | 200A | 0.72 | V Q T S G P A                       |







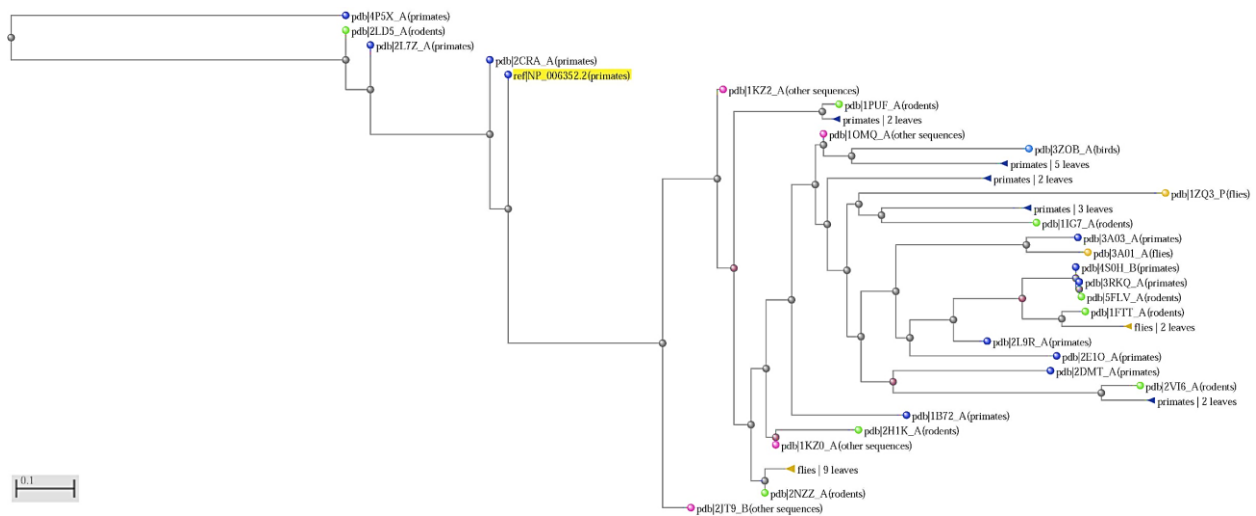

296  
297  
298  
299  
300  
301

**Figure S4. Distance tree (BLAST tree view).** The evolutionary distance tree view for the query sequence NP\_006352 of the human *HOXB13* gene against the 3D protein structures from PDB by psiBLAST. The query sequence is highlighted and the structures of 2CRA, 2LD5 and 2L7Z were found to be closely related to the query sequence. (Figure simulated using psiBLAST)

Sequence identity comparison (ID\_TABLE):

Diagonal ... number of residues;  
Upper triangle ... number of identical residues;  
Lower triangle ... % sequence identity, id/min(length).

|           | 2craA @1 | 2l17za @1 | 2l1d5a @1 |
|-----------|----------|-----------|-----------|
| 2craA @1  | 70       | 25        | 25        |
| 2l17za @1 | 36       | 73        | 67        |
| 2l1d5a @1 | 37       | 100       | 67        |

Weighted pair-group average clustering based on a distance matrix:

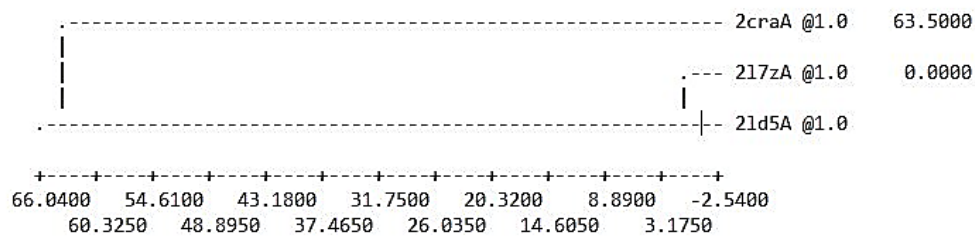

302  
303  
304  
305  
306  
307

**Figure S5. Dendrogram of the protein models for template selection.** The dendrogram depicting the sequence and structural similarity between the query sequence (NP\_006352) and the templates (2CRA, 2LD5, 2L7Z) along with the crystallographic resolution and distance score. (MODELLER v9.17 output is modified and presented only with respect to the dendrogram. The complete log file is given as the supplementary material).

```

aln.pos      10      20      30      40      50      60
217z      M-----SH-----M-----L-----E-----
hoxb13      MEPGNYATLDGAKDIEGLLGAGGGRNLVAHSPLTSHPAAPTLPMPAVNYAPLDLPGSAEPPKQCHPCPG
_consrvd      *                **      *      *      *
aln.p      70      80      90      100     110     120     130
217z      -----
hoxb13      VPQGTSPAPVPYGYFGGGYSCRVSRSSLKPCAQAATLAAYPAETPTAGEEYPSRPTFAFYPGYPGT
_consrvd
aln.pos     140     150     160     170     180     190     200
217z      -----
hoxb13      YQPMASYLDVSVVQTLGAPGEPRHDSLLPVDSYQSWALAGGWNSQMCCQGEQNPPGPFWKAADFSSG
_consrvd
aln.pos     210     220     230     240     250     260     270
217z      -----GRKKRVPYTKVQLKELEREYATNKFITKDKRRRISATTNLSEKQTIWFQNRVKEK
hoxb13      QHPPDACAFRRGRKKRIPYSGQLRELEREYAAANKFITKDKRRKISAATSLSEKQITWFQNRVKEK
_consrvd      ***** ** * * * ***** ***** ** * * * ***** *****
aln.pos      280
217z      KVINKLK--TTS
hoxb13      KVLAKVKNSATP
_consrvd      ** * * *

```

308  
309 **Figure S6. Sequence Alignment.** Alignment of the query sequence (NP\_006352) and the template  
310 structure (2L7Z) by “align2d()” function in MODELLER v9.17. The conserved regions are marked with  
311 “\*”.

```

>> Summary of successfully produced models:
Filename      molpdf      DOPE score      GA341 score
-----
hoxb13.B99990001.pdb      1885.69495      -10484.60254      1.00000
hoxb13.B99990002.pdb      1922.29309      -10409.19922      1.00000
hoxb13.B99990003.pdb      1842.38245      -10583.86133      1.00000
hoxb13.B99990004.pdb      1817.28308      -9984.49707      1.00000
hoxb13.B99990005.pdb      2038.60388      -10264.55859      0.99998
hoxb13.B99990006.pdb      1870.09277      -10574.50586      1.00000
hoxb13.B99990007.pdb      1816.82886      -10236.62109      1.00000
hoxb13.B99990008.pdb      1951.74414      -10313.67969      1.00000
hoxb13.B99990009.pdb      1849.80408      -10244.52930      1.00000
hoxb13.B99990010.pdb      2053.90625      -9857.58594      1.00000
hoxb13.B99990011.pdb      1971.08386      -10291.44434      1.00000
hoxb13.B99990012.pdb      1760.51611      -10441.24316      1.00000
hoxb13.B99990013.pdb      2071.74658      -9961.14844      1.00000
hoxb13.B99990014.pdb      1832.09875      -10223.19531      1.00000
hoxb13.B99990015.pdb      1922.36023      -10460.26270      1.00000
hoxb13.B99990016.pdb      1832.76843      -9883.15527      1.00000
hoxb13.B99990017.pdb      1876.18530      -10225.71875      1.00000
hoxb13.B99990018.pdb      1830.91150      -10327.13477      1.00000
hoxb13.B99990019.pdb      1969.15601      -9949.65625      1.00000
hoxb13.B99990020.pdb      1866.18628      -10174.37109      1.00000
hoxb13.B99990021.pdb      1777.33093      -10453.66211      1.00000
hoxb13.B99990022.pdb      2172.37231      -9960.09570      0.99943
hoxb13.B99990023.pdb      1922.39783      -10080.08105      1.00000
hoxb13.B99990024.pdb      1994.17981      -10181.44141      1.00000
hoxb13.B99990025.pdb      1855.46252      -10159.99902      1.00000
hoxb13.B99990026.pdb      1936.13440      -10661.23047      1.00000
hoxb13.B99990027.pdb      1940.19763      -10281.40625      1.00000
hoxb13.B99990028.pdb      1830.59180      -10607.12988      1.00000
hoxb13.B99990029.pdb      1976.05896      -10401.53516      1.00000
hoxb13.B99990030.pdb      1849.06604      -10516.29102      1.00000

```

312  
313 **Figure S7. Summary of the Generated Models.** The figure depicts the summary of all the 30 *HOXB13*  
314 models generated by MODELLER v9.17 along with the molpdf value, DOPE and GA341 scores.

18 beta turns

| Turn          | Sequence | Turn type | H-bond |
|---------------|----------|-----------|--------|
| Ala21-Gly24   | AGGG     | II        | Yes    |
| Thr34-Pro37   | TSHP     | IV        |        |
| His36-Ala39   | HPAA     | IV        |        |
| Ala39-Leu42   | APTL     | IV        |        |
| Met43-Val46   | MPAV     | IV        |        |
| Asn47-Pro50   | NYAP     | IV        |        |
| Asp52-Gly55   | DLPG     | IV        |        |
| Ser56-Pro59   | SAEP     | IV        |        |
| Gln62-Pro65   | QCHP     | IV        |        |
| Val69-Gly72   | VPQG     | VIII      |        |
| Gly216-Lys219 | GRKK     | IV        |        |
| Lys218-Ile221 | KKRI     | IV        | Yes    |
| Pro222-Lys225 | PYSK     | IV        |        |
| Asn238-Ile241 | NKFI     | VIII      |        |
| Ala276-Lys279 | AKVK     | IV        |        |
| Lys277-Asn280 | KVKN     | I         | Yes    |
| Lys279-Ala282 | KNSA     | IV        | Yes    |
| Asn280-Thr283 | NSAT     | VIII      |        |

(d)

Secondary structure summary

| Strand   | Alpha helix | 3-10 helix | Other       | Total residues |
|----------|-------------|------------|-------------|----------------|
| 0 (0.0%) | 39 (13.7%)  | 0 (0.0%)   | 245 (86.3%) | 284            |

(a)

3 helix-helix interactions

| Helices | Helix types |     | Interaction type |      | No. interacting residues |         |
|---------|-------------|-----|------------------|------|--------------------------|---------|
|         | 1           | 2   | type             | type | Helix 1                  | Helix 2 |
| 1       | 2           | H H | N                | C    | 4                        | 2       |
| 1       | 3           | H H | I                | I    | 8                        | 7       |
| 2       | 3           | H H | I                | I    | 4                        | 5       |

(b)

3 helices

| Start  | End    | Type | No. resid |
|--------|--------|------|-----------|
| Lys225 | Ala237 | H    | 13        |
| Lys243 | Ala252 | H    | 10        |
| Arg258 | Lys273 | H    | 16        |

(c)

40 gamma turns

| Start  | End    | Sequence | Turn type |
|--------|--------|----------|-----------|
| Ala7   | Leu9   | ATL      | INVERSE   |
| Thr8   | Asp10  | TLD      | INVERSE   |
| Leu9   | Gly11  | LDG      | INVERSE   |
| Asp10  | Ala12  | DGA      | INVERSE   |
| Lys13  | Ile15  | KDI      | INVERSE   |
| Asp14  | Glu16  | DIE      | INVERSE   |
| Gly17  | Leu19  | GLL      | INVERSE   |
| Leu18  | Gly20  | LLG      | INVERSE   |
| Leu19  | Ala21  | LGA      | INVERSE   |
| Gly20  | Gly22  | GAG      | INVERSE   |
| Gly23  | Arg25  | GGR      | INVERSE   |
| Arg25  | Leu27  | RNL      | INVERSE   |
| Asn26  | Val28  | NLV      | INVERSE   |
| Ala29  | Ser31  | AHS      | INVERSE   |
| Pro37  | Ala39  | PAA      | INVERSE   |
| Pro40  | Leu42  | PTL      | INVERSE   |
| Pro44  | Val46  | PAV      | INVERSE   |
| Pro79  | Gly81  | PYG      | INVERSE   |
| Tyr90  | Tyr82  | YGY      | INVERSE   |
| Tyr98  | Cys90  | YSC      | INVERSE   |
| Ser89  | Arg91  | SCR      | INVERSE   |
| Cys90  | Val92  | CRV      | INVERSE   |
| Arg91  | Ser93  | RVS      | INVERSE   |
| Tyr109 | Ala111 | YPA      | INVERSE   |
| Glu118 | Tyr120 | EY       | INVERSE   |
| Tyr120 | Ser122 | YPS      | INVERSE   |
| Tyr130 | Gly132 | YPG      | INVERSE   |
| Pro131 | Tyr133 | PGY      | INVERSE   |
| Val146 | Val148 | VSV      | INVERSE   |
| Ser147 | Val149 | SVV      | INVERSE   |
| Asp161 | Leu163 | DSL      | INVERSE   |
| Leu164 | Val166 | LPV      | INVERSE   |
| Pro165 | Asp167 | PVD      | INVERSE   |
| Ala210 | Ala212 | ACA      | INVERSE   |
| Cys211 | Phe213 | CAF      | INVERSE   |
| Arg215 | Arg217 | RGR      | CLASSIC   |
| Arg217 | Lys219 | RKK      | INVERSE   |
| Lys218 | Arg220 | KKR      | INVERSE   |
| Leu255 | Glu257 | LSE      | INVERSE   |
| Ser256 | Arg258 | SER      | CLASSIC   |

(e)

315  
 316 **Figure S8. Evaluation and validation of the hoxb13.B99990026.pdb modelled protein by PDBSum**  
 317 (a) The secondary structure summary (%) of the modelled *HOXB13* “hoxb13.B99990026.pdb” 3D protein  
 318 structure. (b) The residues involved in the helix-helix interactions in the 3D protein structure is given in  
 319 the figure. (c) The amino acid residues contributing to the alpha helical structure of the modelled  
 320 *HOXB13* protein is denoted. (d) and (e) The Figure denotes the location, contributing amino acid,  
 321 sequence and the associated turns (both the beta and gamma turns) present in the modelled *HOXB13*  
 322 protein (Results computed from PDBSum).

323  
 324  
 325  
 326
